# Supplementary material
Source: PubMed Central journal article supplement (PMC3849216)
Supplement: NIHMS446763-supplement-Supplementary_Data_1.pdf [file NIHMS446763-supplement-Supplementary_Data_1.pdf]

# 1 Alpha proteins

1. 1a32
2. 1ail
3. 1bgf
4. 1bkr
5. 1cei
6. 1cg5
7. 1elw
8. 1enh
9. 1eyv
10. 1ig5
11. 1lis
12. 1r69
13. 1utg
14. 256b

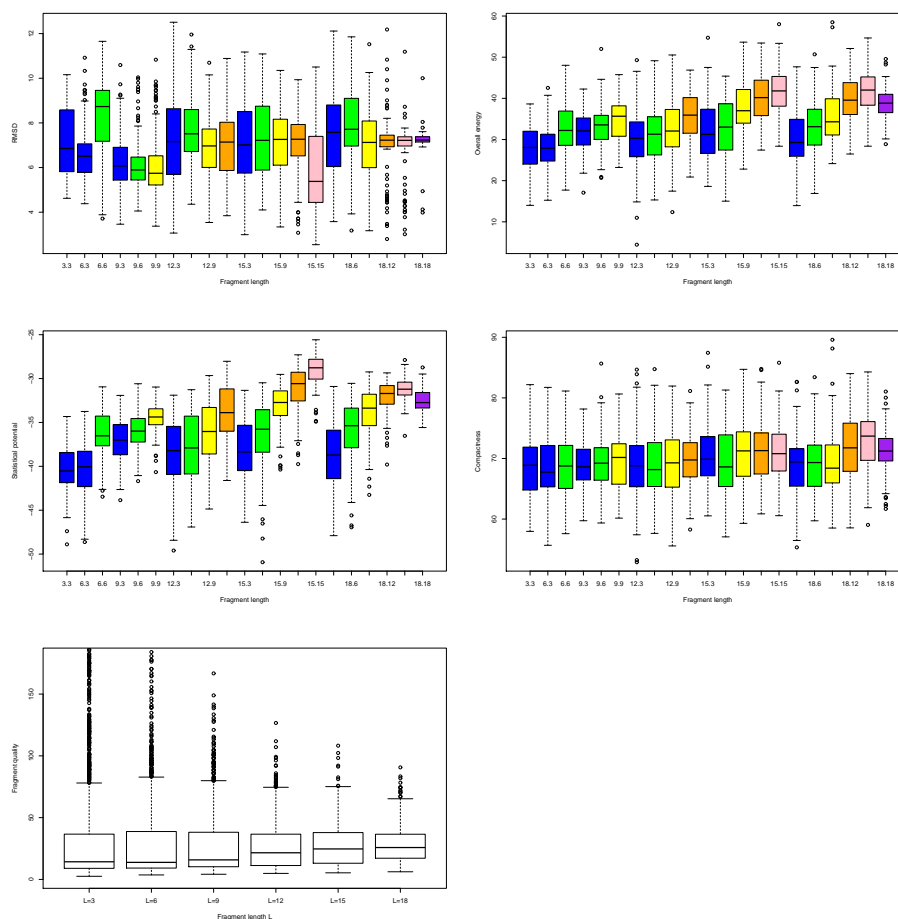

Figure 1: Results for 1a32, showing the distribution of RMSD to the native, overall energy, statistical potential terms, secondary structure terms and the quality of the fragment set. The distributions are shown in the form of box-and-whisker plots (as implemented in R). The center, top and bottom of the box correspond to the median, top and bottom quartile of the distribution, respectively, with the whiskers indicating the minimum and maximum value reached (outliers are indicated by circles). The notation  $X.Y$  is used to label the results for a fragment length of  $X$  and a move length of  $Y$  and the results appear in lexicographic order.

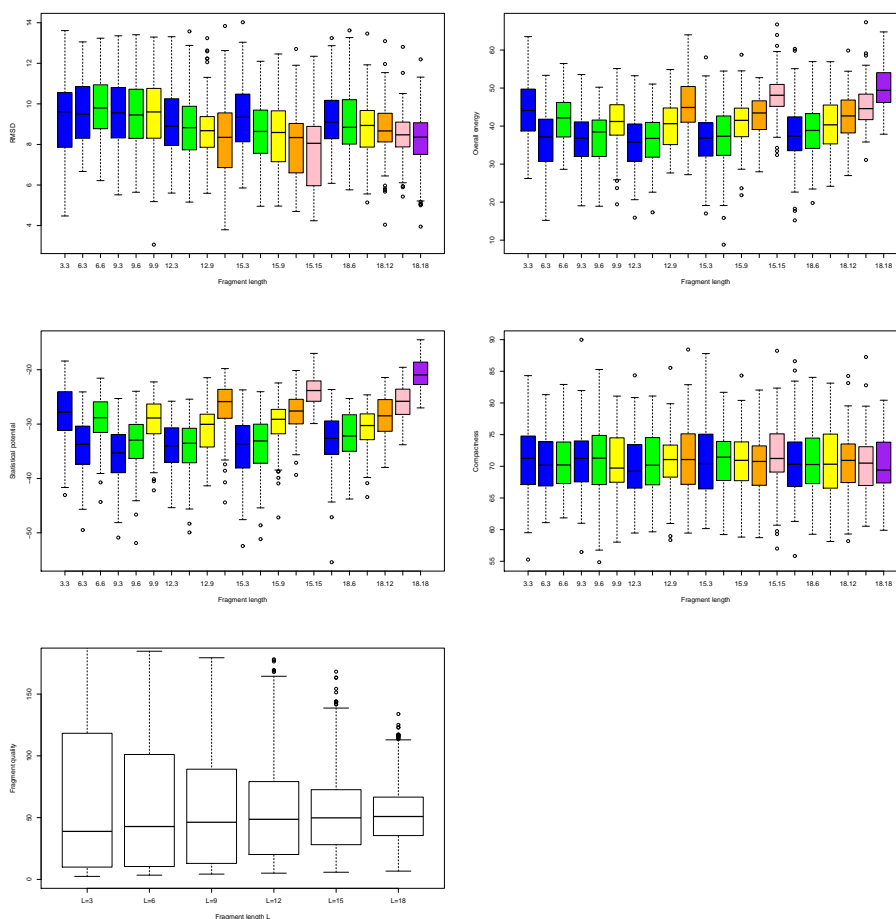

Figure 2: Results for 1ail, showing the distribution of RMSD to the native, overall energy, statistical potential terms, secondary structure terms and the quality of the fragment set. The distributions are shown in the form of box-and-whisker plots (as implemented in R). The center, top and bottom of the box correspond to the median, top and bottom quartile of the distribution, respectively, with the whiskers indicating the minimum and maximum value reached (outliers are indicated by circles). The notation  $X.Y$  is used to label the results for a fragment length of  $X$  and a move length of  $Y$  and the results appear in lexicographic order.

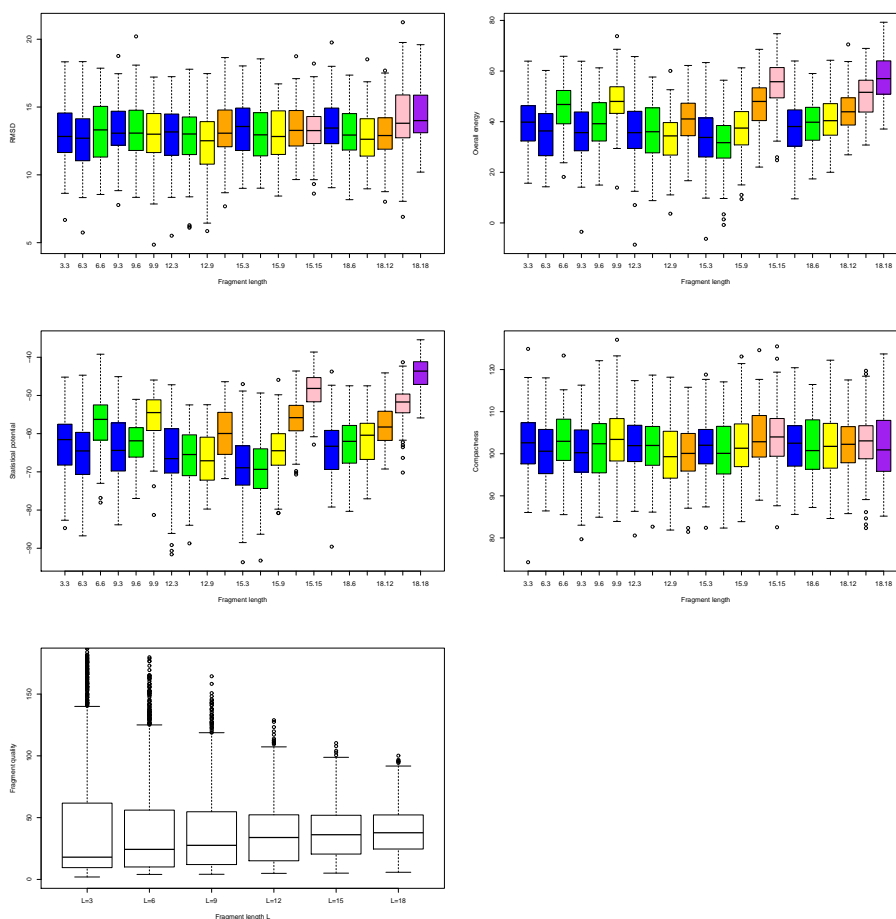

Figure 3: Results for 1bgf, showing the distribution of RMSD to the native, overall energy, statistical potential terms, secondary structure terms and the quality of the fragment set. The distributions are shown in the form of box-and-whisker plots (as implemented in R). The center, top and bottom of the box correspond to the median, top and bottom quartile of the distribution, respectively, with the whiskers indicating the minimum and maximum value reached (outliers are indicated by circles). The notation  $X.Y$  is used to label the results for a fragment length of  $X$  and a move length of  $Y$  and the results appear in lexicographic order.

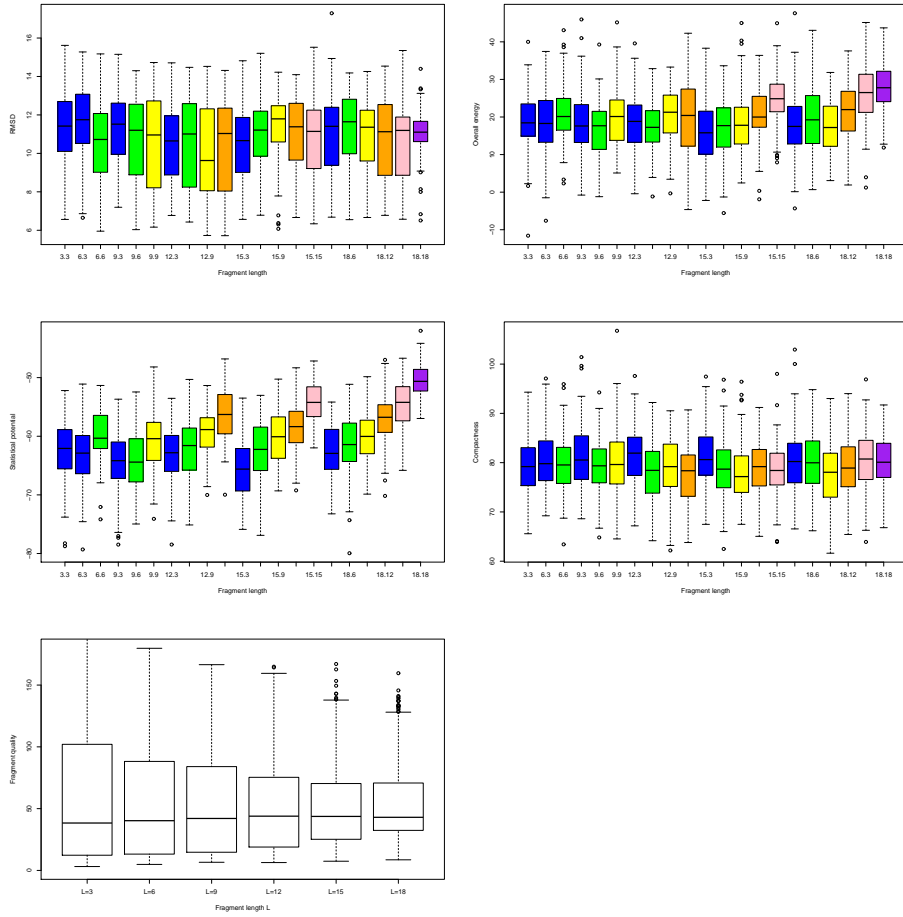

Figure 4: Results for 1cei, showing the distribution of RMSD to the native, overall energy, statistical potential terms, secondary structure terms and the quality of the fragment set. The distributions are shown in the form of box-and-whisker plots (as implemented in R). The center, top and bottom of the box correspond to the median, top and bottom quartile of the distribution, respectively, with the whiskers indicating the minimum and maximum value reached (outliers are indicated by circles). The notation  $X.Y$  is used to label the results for a fragment length of  $X$  and a move length of  $Y$  and the results appear in lexicographic order.

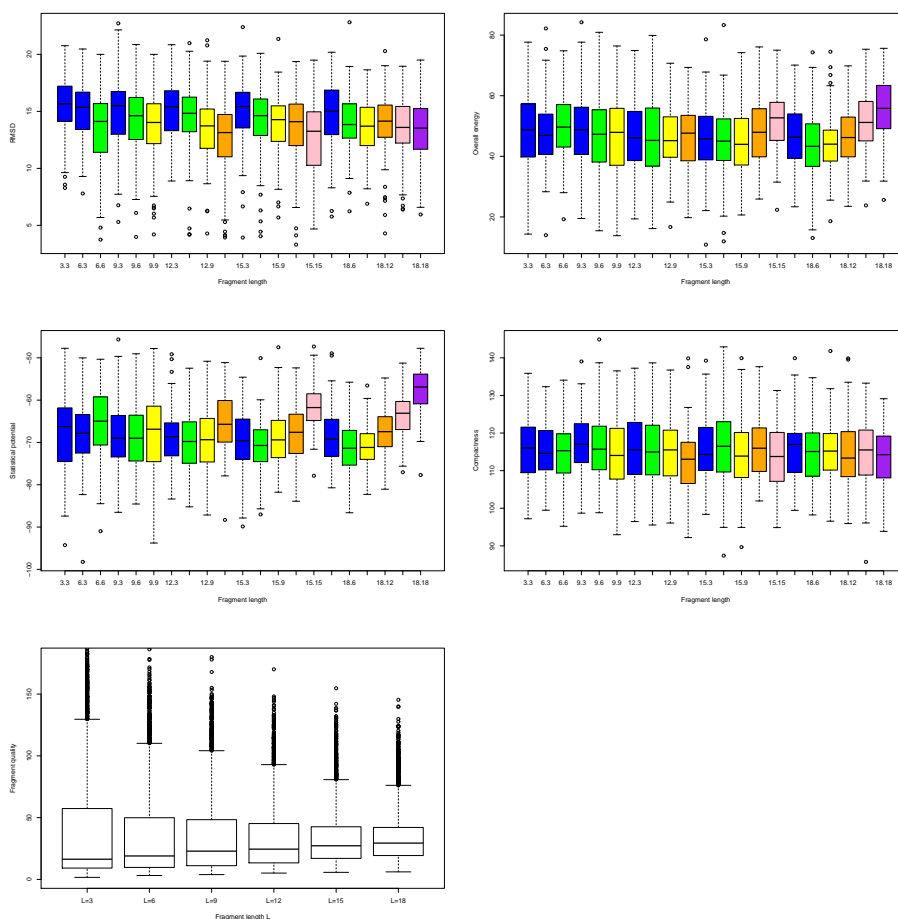

Figure 5: Results for 1cg5, showing the distribution of RMSD to the native, overall energy, statistical potential terms, secondary structure terms. The distributions are shown in the form of box-and-whisker plots (as implemented in R). The center, top and bottom of the box correspond to the median, top and bottom quartile of the distribution, respectively, with the whiskers indicating the minimum and maximum value reached (outliers are indicated by circles). The notation  $X.Y$  is used to label the results for a fragment length of  $X$  and a move length of  $Y$  and the results appear in lexicographic order.

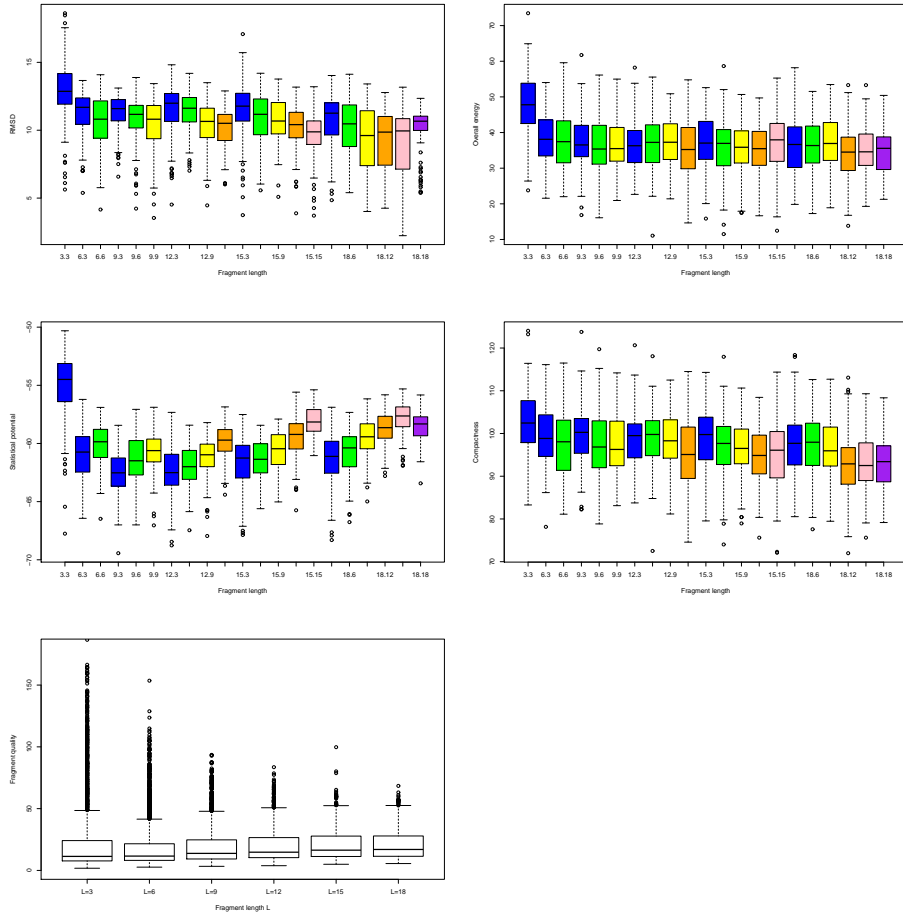

Figure 6: Results for 1elw, showing the distribution of RMSD to the native, overall energy, statistical potential terms, secondary structure terms and the quality of the fragment set. The distributions are shown in the form of box-and-whisker plots (as implemented in R). The center, top and bottom of the box correspond to the median, top and bottom quartile of the distribution, respectively, with the whiskers indicating the minimum and maximum value reached (outliers are indicated by circles). The notation  $X.Y$  is used to label the results for a fragment length of  $X$  and a move length of  $Y$  and the results appear in lexicographic order.

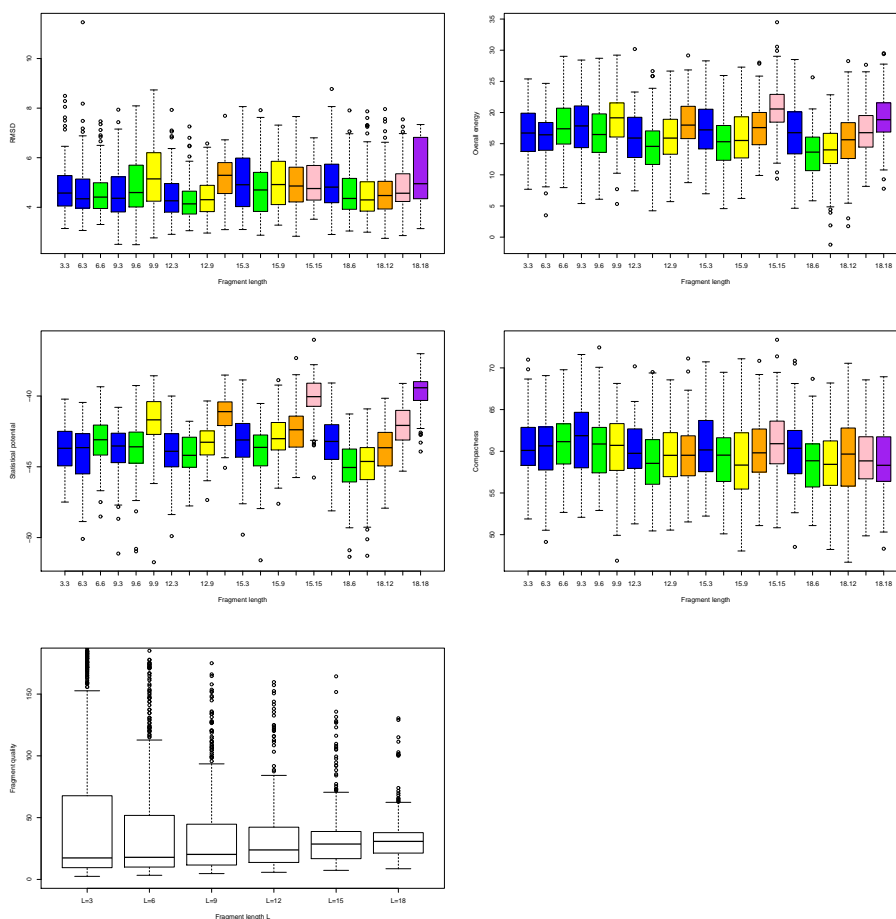

Figure 7: Results for 1enh, showing the distribution of RMSD to the native, overall energy, statistical potential terms, secondary structure terms and the quality of the fragment set. The distributions are shown in the form of box-and-whisker plots (as implemented in R). The center, top and bottom of the box correspond to the median, top and bottom quartile of the distribution, respectively, with the whiskers indicating the minimum and maximum value reached (outliers are indicated by circles). The notation  $X.Y$  is used to label the results for a fragment length of  $X$  and a move length of  $Y$  and the results appear in lexicographic order.



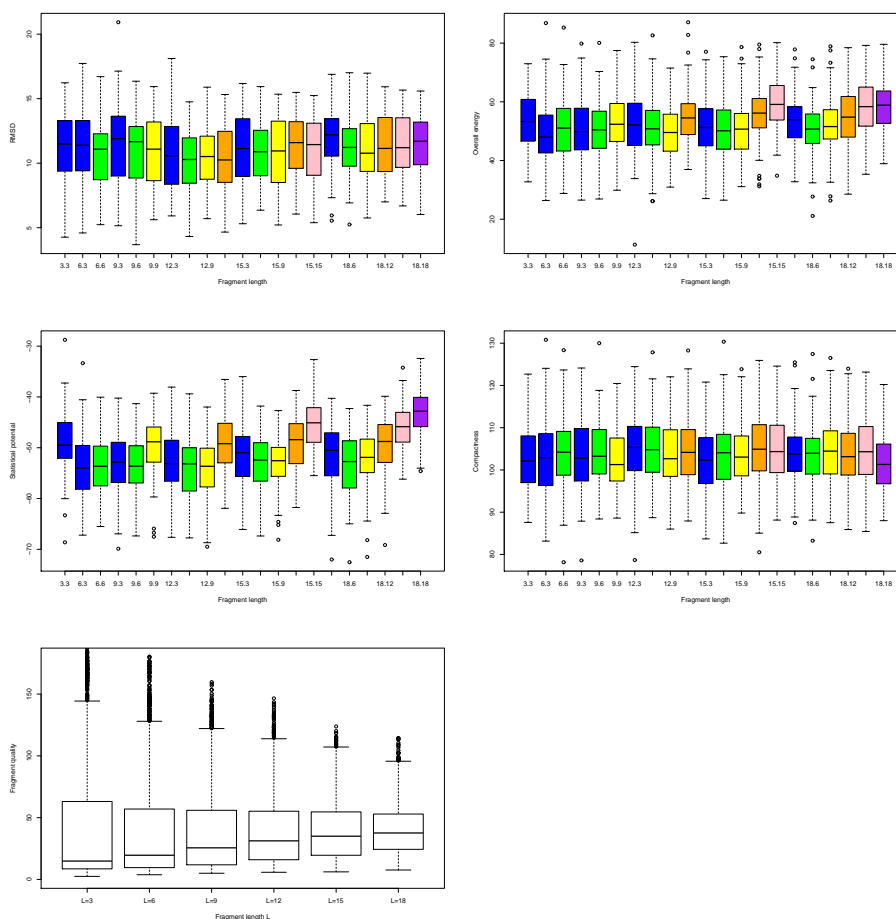

Figure 8: Results for 1eyv, showing the distribution of RMSD to the native, overall energy, statistical potential terms, secondary structure terms and the quality of the fragment set. The distributions are shown in the form of box-and-whisker plots (as implemented in R). The center, top and bottom of the box correspond to the median, top and bottom quartile of the distribution, respectively, with the whiskers indicating the minimum and maximum value reached (outliers are indicated by circles). The notation  $X.Y$  is used to label the results for a fragment length of  $X$  and a move length of  $Y$  and the results appear in lexicographic order.

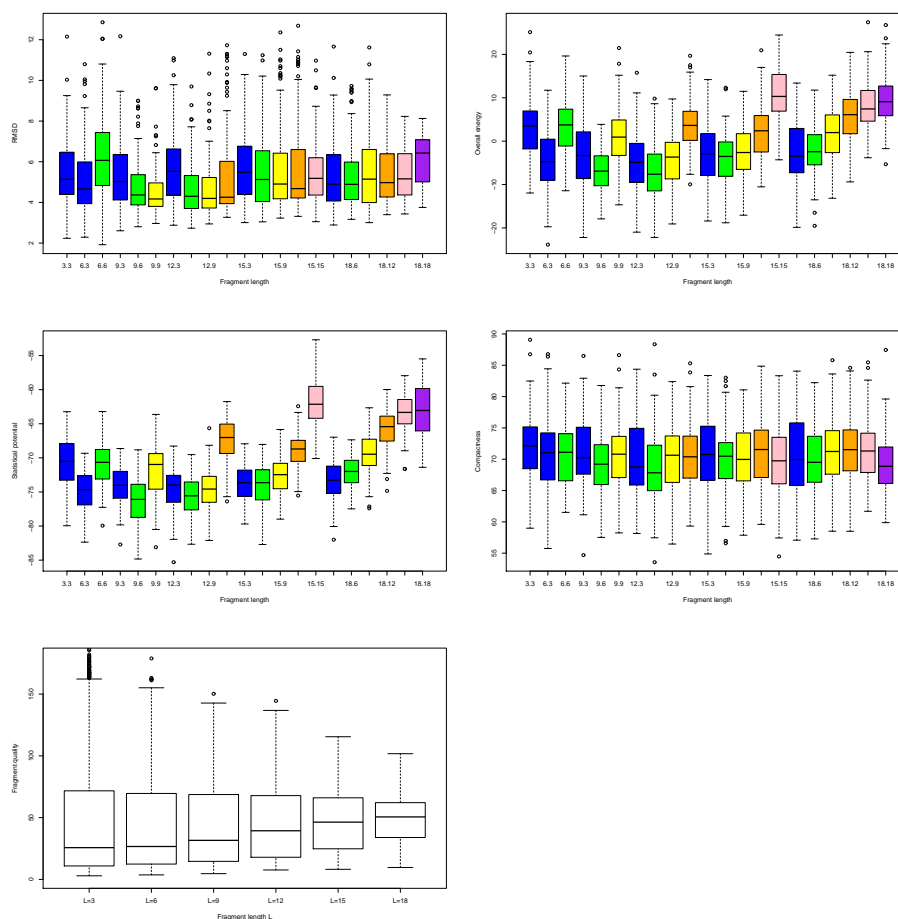

Figure 9: Results for 1ig5, showing the distribution of RMSD to the native, overall energy, statistical potential terms, secondary structure terms and the quality of the fragment set. The distributions are shown in the form of box-and-whisker plots (as implemented in R). The center, top and bottom of the box correspond to the median, top and bottom quartile of the distribution, respectively, with the whiskers indicating the minimum and maximum value reached (outliers are indicated by circles). The notation  $X.Y$  is used to label the results for a fragment length of  $X$  and a move length of  $Y$  and the results appear in lexicographic order.

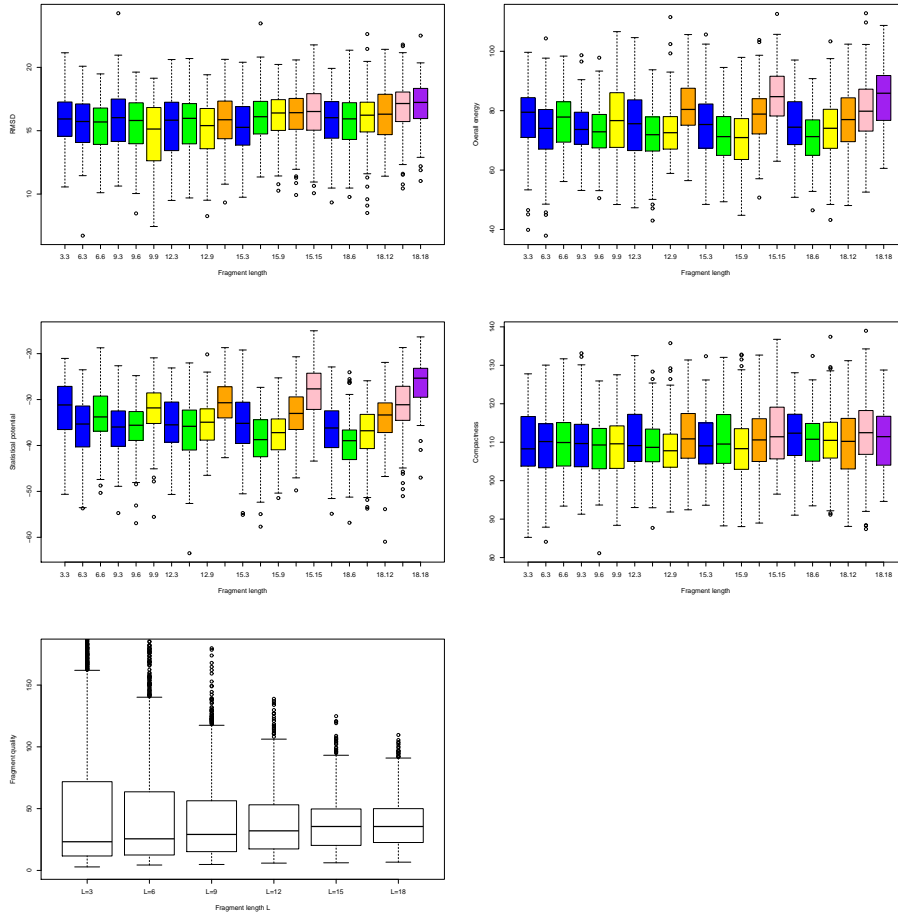

Figure 10: Results for 11s, showing the distribution of RMSD to the native, overall energy, statistical potential terms, secondary structure terms and the quality of the fragment set. The distributions are shown in the form of box-and-whisker plots (as implemented in R). The center, top and bottom of the box correspond to the median, top and bottom quartile of the distribution, respectively, with the whiskers indicating the minimum and maximum value reached (outliers are indicated by circles). The notation  $X.Y$  is used to label the results for a fragment length of  $X$  and a move length of  $Y$  and the results appear in lexicographic order.

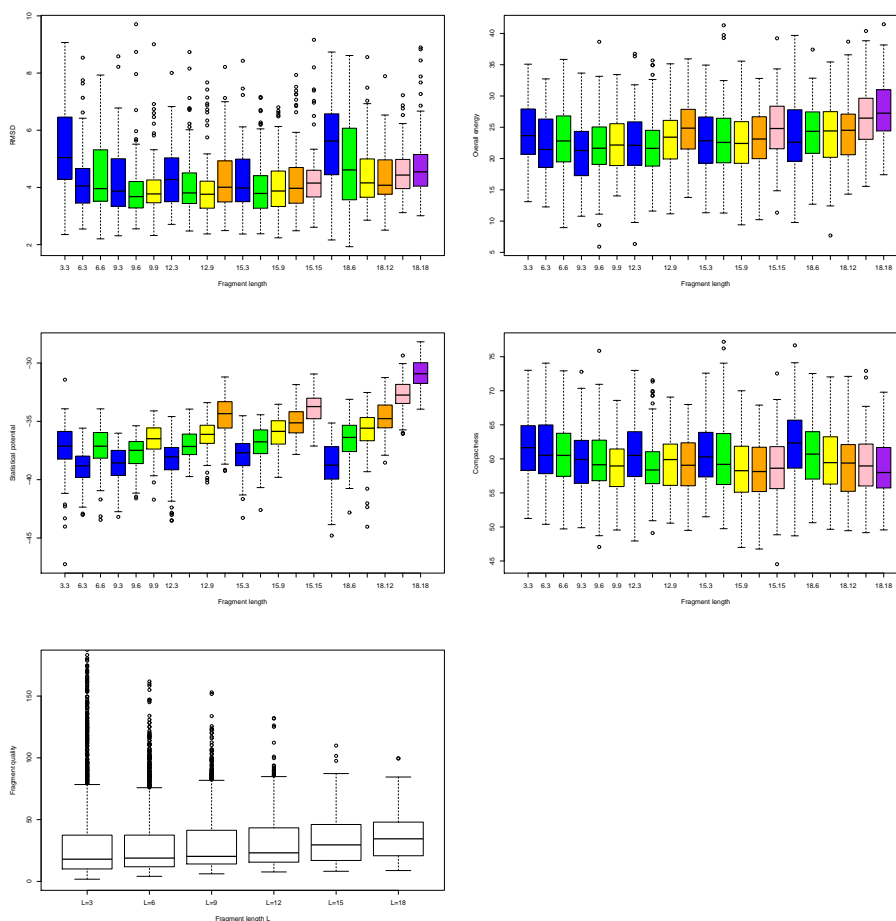

Figure 11: Results for 1r69, showing the distribution of RMSD to the native, overall energy, statistical potential terms, secondary structure terms and the quality of the fragment set. The distributions are shown in the form of box-and-whisker plots (as implemented in R). The center, top and bottom of the box correspond to the median, top and bottom quartile of the distribution, respectively, with the whiskers indicating the minimum and maximum value reached (outliers are indicated by circles). The notation  $X.Y$  is used to label the results for a fragment length of  $X$  and a move length of  $Y$  and the results appear in lexicographic order.

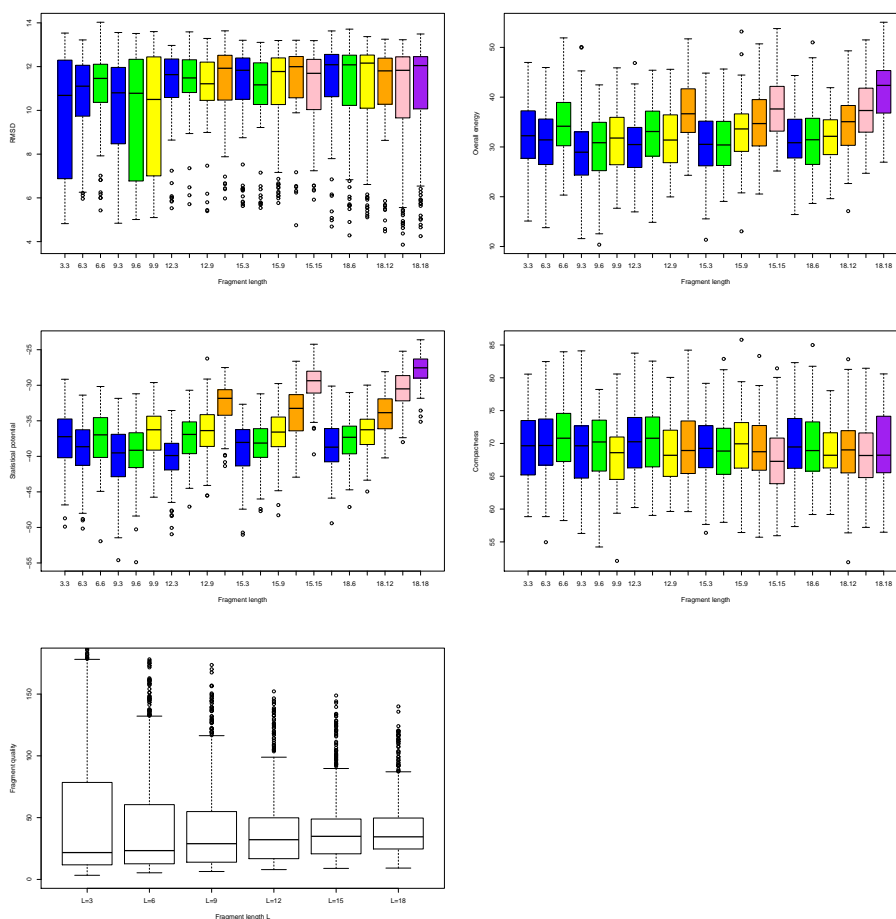

Figure 12: Results for 1utg, showing the distribution of RMSD to the native, overall energy, statistical potential terms, secondary structure terms and the quality of the fragment set. The distributions are shown in the form of box-and-whisker plots (as implemented in R). The center, top and bottom of the box correspond to the median, top and bottom quartile of the distribution, respectively, with the whiskers indicating the minimum and maximum value reached (outliers are indicated by circles). The notation  $X.Y$  is used to label the results for a fragment length of  $X$  and a move length of  $Y$  and the results appear in lexicographic order.

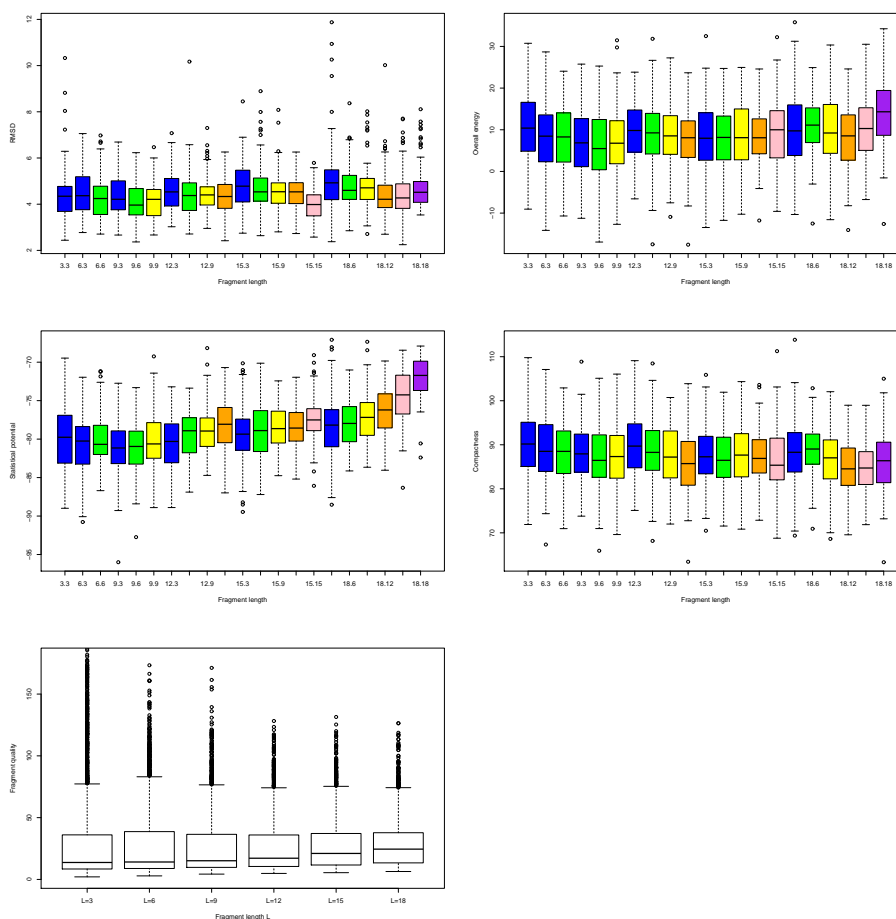

Figure 13: Results for 256b, showing the distribution of RMSD to the native, overall energy, statistical potential terms, secondary structure terms and the quality of the fragment set. The distributions are shown in the form of box-and-whisker plots (as implemented in R). The center, top and bottom of the box correspond to the median, top and bottom quartile of the distribution, respectively, with the whiskers indicating the minimum and maximum value reached (outliers are indicated by circles). The notation  $X.Y$  is used to label the results for a fragment length of  $X$  and a move length of  $Y$  and the results appear in lexicographic order.
