# Supplementary material
Source: PubMed Central journal article supplement (PMC3849216)
Supplement: NIHMS446763-supplement-Supplementary_Data_2.pdf [file NIHMS446763-supplement-Supplementary_Data_2.pdf]

1. 1ptq
2. 1rnb
3. 1scj
4. 1tif
5. 1tig
6. 1ubi
7. 1ugh
8. 1urn
9. 1vcc
10. 2acy
11. 2chf
12. 2ci2
13. 2vik
14. 4ubp
15. 5cro

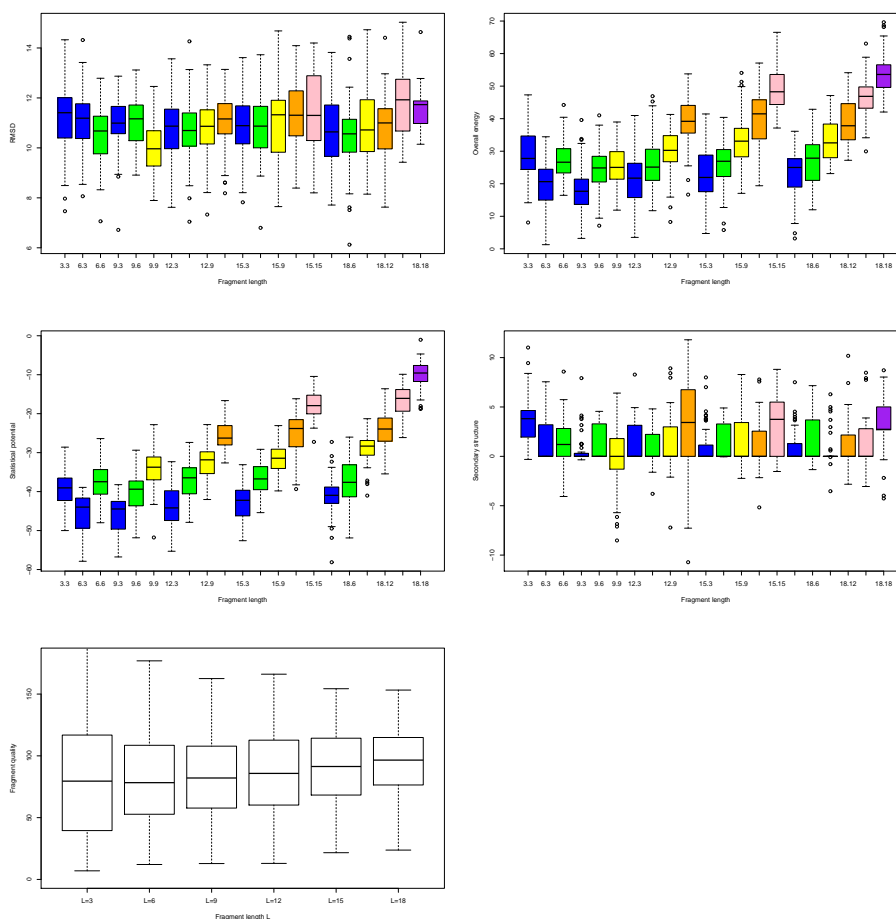

Figure 1: Results for 1ptq, showing the distribution of RMSD to the native, overall energy, statistical potential terms, secondary structure terms and the quality of the fragment set. The distributions are shown in the form of box-and-whisker plots (as implemented in R). The center, top and bottom of the box correspond to the median, top and bottom quartile of the distribution, respectively, with the whiskers indicating the minimum and maximum value reached (outliers are indicated by circles). The notation  $X.Y$  is used to label the results for a fragment length of  $X$  and a move length of  $Y$  and the results appear in lexicographic order.

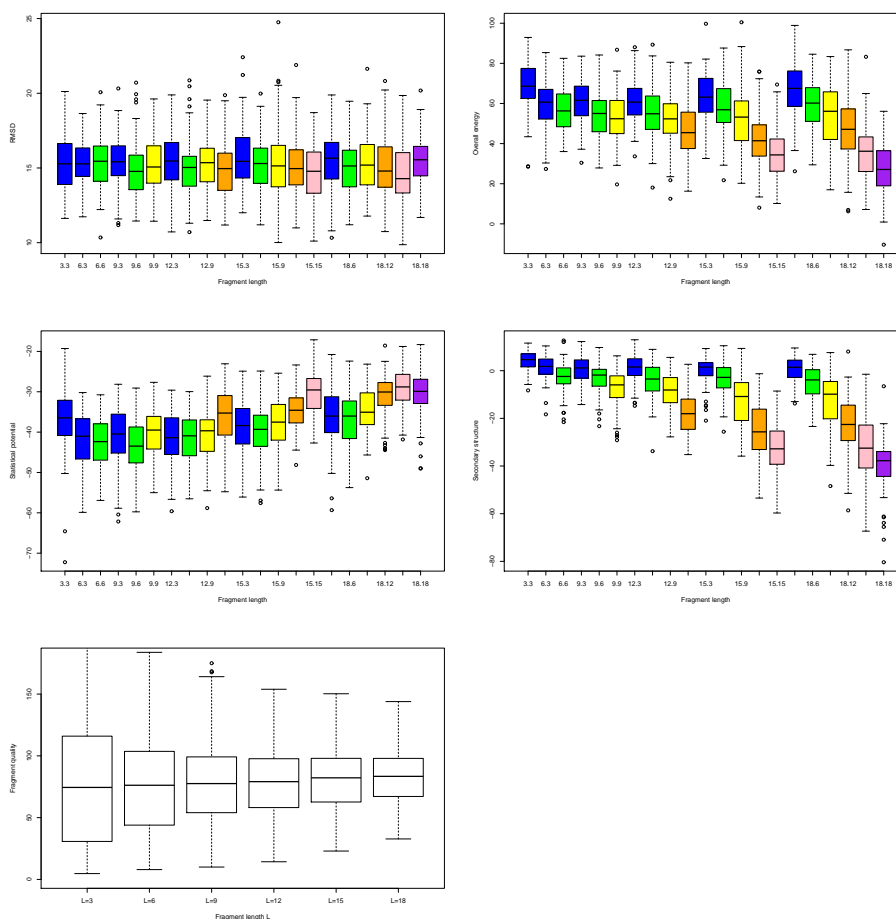

Figure 2: Results for 1rnb, showing the distribution of RMSD to the native, overall energy, statistical potential terms, secondary structure terms and the quality of the fragment set. The distributions are shown in the form of box-and-whisker plots (as implemented in R). The center, top and bottom of the box correspond to the median, top and bottom quartile of the distribution, respectively, with the whiskers indicating the minimum and maximum value reached (outliers are indicated by circles). The notation  $X.Y$  is used to label the results for a fragment length of  $X$  and a move length of  $Y$  and the results appear in lexicographic order.

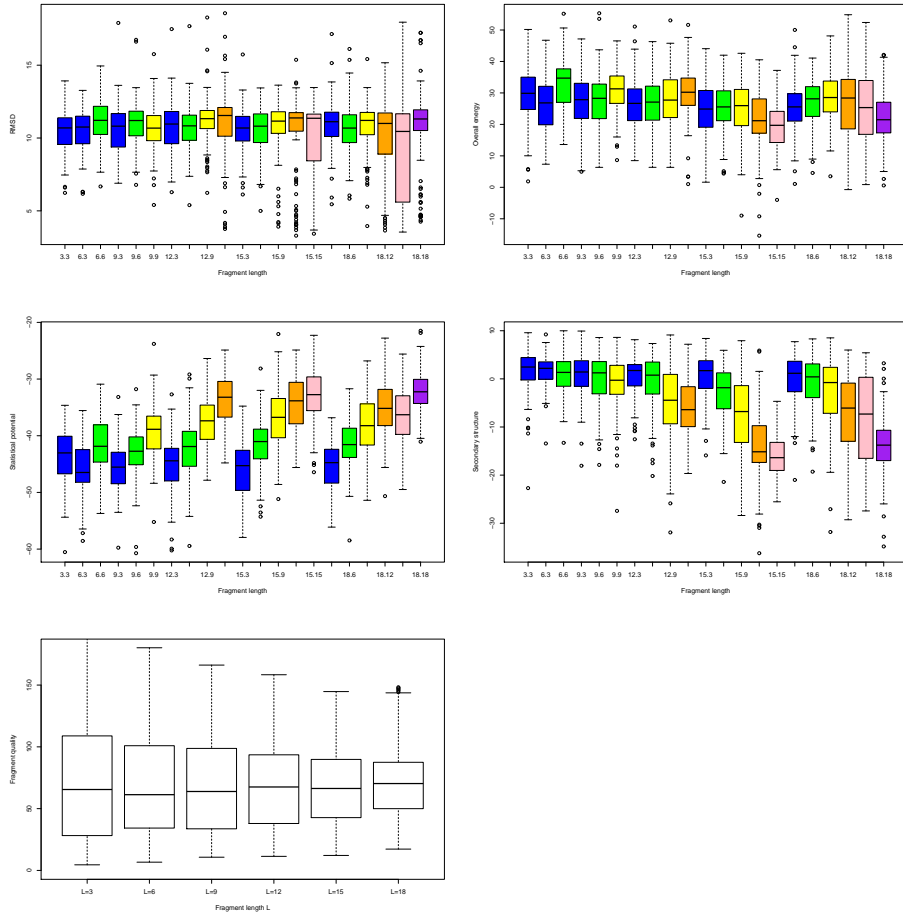

Figure 3: Results for 1scj, showing the distribution of RMSD to the native, overall energy, statistical potential terms, secondary structure terms and the quality of the fragment set. The distributions are shown in the form of box-and-whisker plots (as implemented in R). The center, top and bottom of the box correspond to the median, top and bottom quartile of the distribution, respectively, with the whiskers indicating the minimum and maximum value reached (outliers are indicated by circles). The notation  $X.Y$  is used to label the results for a fragment length of  $X$  and a move length of  $Y$  and the results appear in lexicographic order.

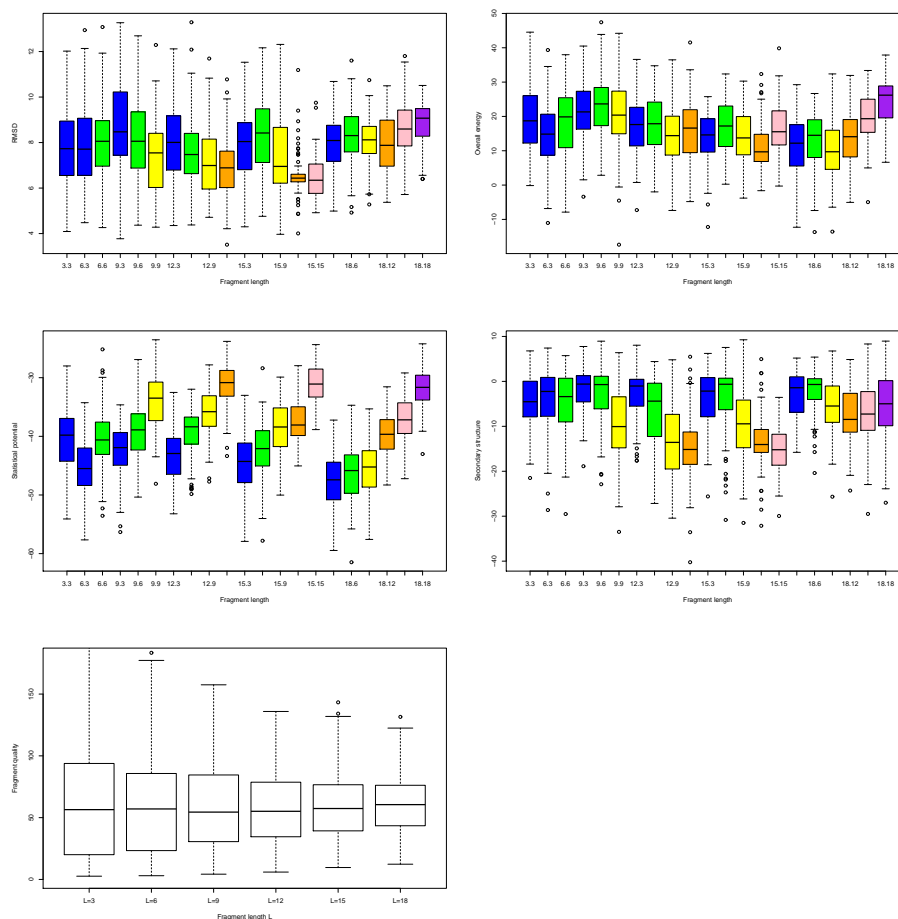

Figure 4: Results for 1tif, showing the distribution of RMSD to the native, overall energy, statistical potential terms, secondary structure terms and the quality of the fragment set. The distributions are shown in the form of box-and-whisker plots (as implemented in R). The center, top and bottom of the box correspond to the median, top and bottom quartile of the distribution, respectively, with the whiskers indicating the minimum and maximum value reached (outliers are indicated by circles). The notation  $X.Y$  is used to label the results for a fragment length of  $X$  and a move length of  $Y$  and the results appear in lexicographic order.

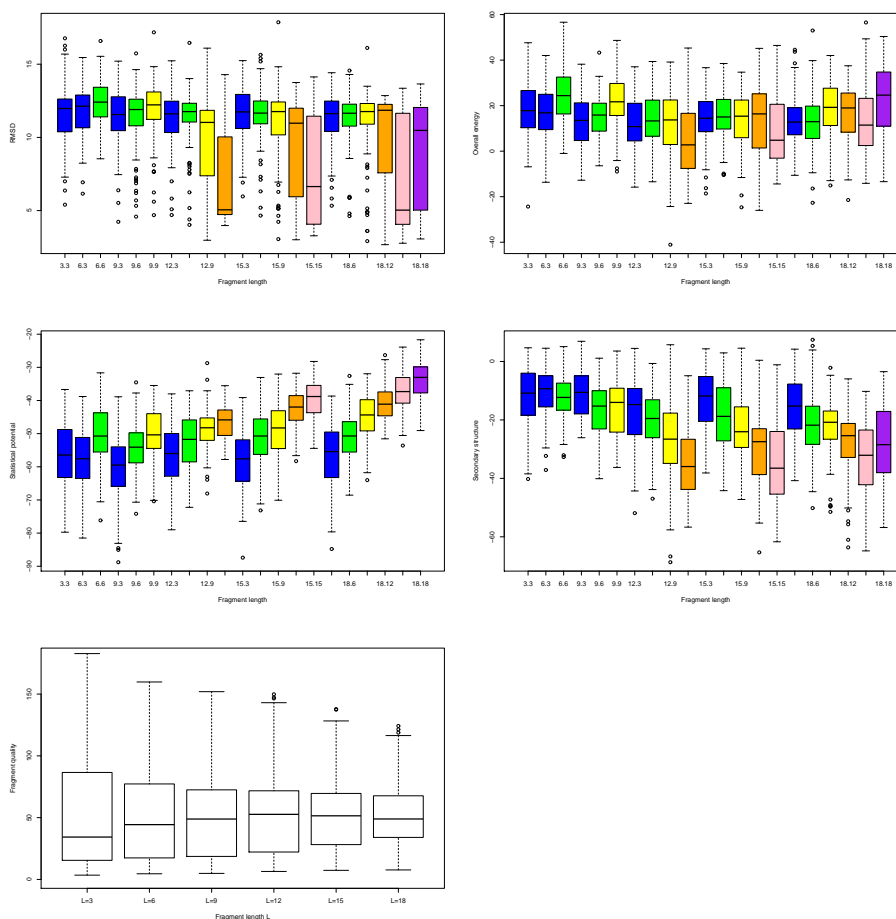

Figure 5: Results for 1tig, showing the distribution of RMSD to the native, overall energy, statistical potential terms, secondary structure terms and the quality of the fragment set. The distributions are shown in the form of box-and-whisker plots (as implemented in R). The center, top and bottom of the box correspond to the median, top and bottom quartile of the distribution, respectively, with the whiskers indicating the minimum and maximum value reached (outliers are indicated by circles). The notation  $X.Y$  is used to label the results for a fragment length of  $X$  and a move length of  $Y$  and the results appear in lexicographic order.

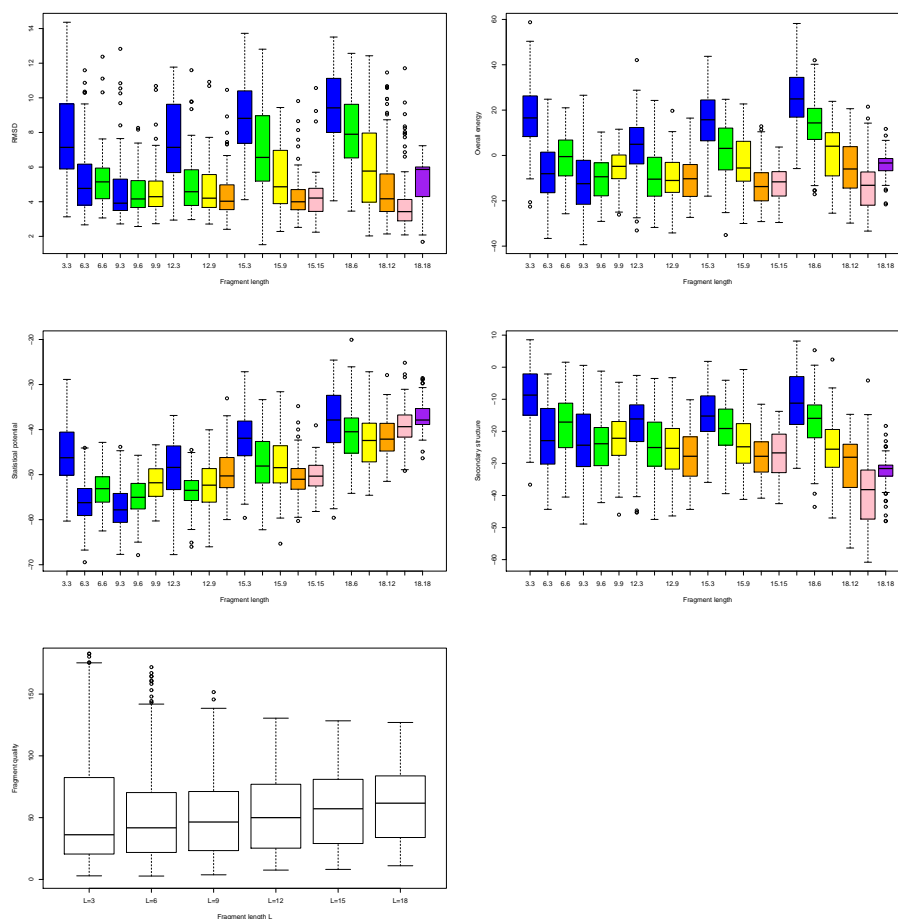

Figure 6: Results for 1ubi, showing the distribution of RMSD to the native, overall energy, statistical potential terms, secondary structure terms and the quality of the fragment set. The distributions are shown in the form of box-and-whisker plots (as implemented in R). The center, top and bottom of the box correspond to the median, top and bottom quartile of the distribution, respectively, with the whiskers indicating the minimum and maximum value reached (outliers are indicated by circles). The notation  $X.Y$  is used to label the results for a fragment length of  $X$  and a move length of  $Y$  and the results appear in lexicographic order.

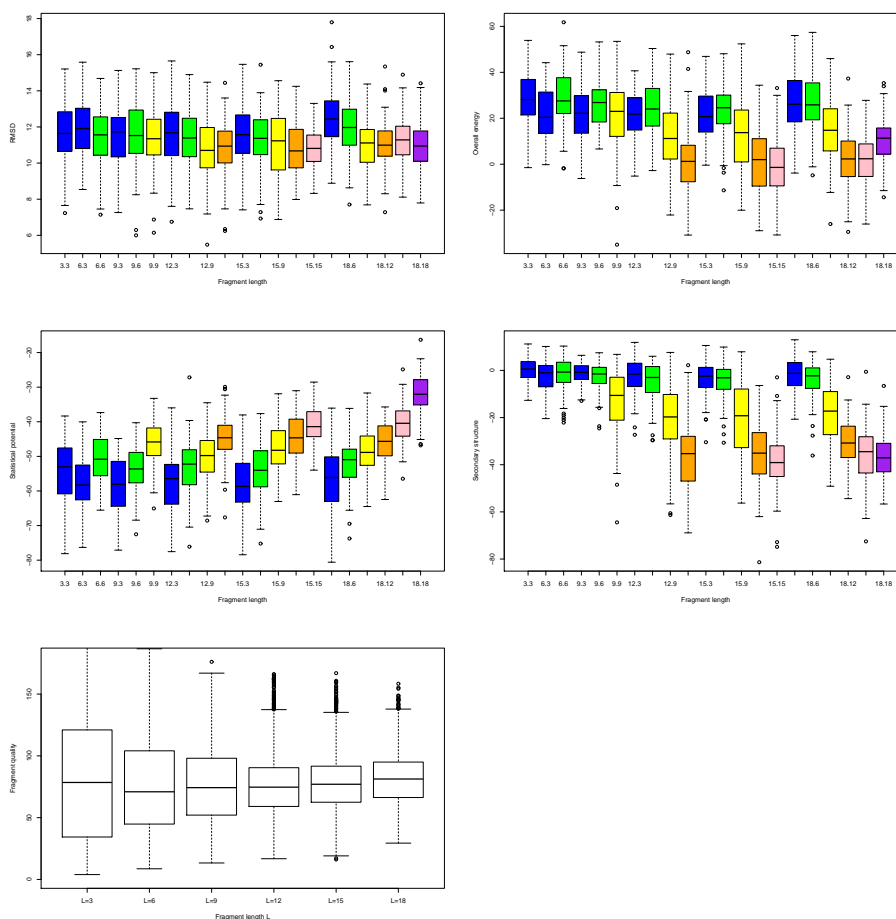

Figure 7: Results for 1ugh, showing the distribution of RMSD to the native, overall energy, statistical potential terms, secondary structure terms and the quality of the fragment set. The distributions are shown in the form of box-and-whisker plots (as implemented in R). The center, top and bottom of the box correspond to the median, top and bottom quartile of the distribution, respectively, with the whiskers indicating the minimum and maximum value reached (outliers are indicated by circles). The notation  $X.Y$  is used to label the results for a fragment length of  $X$  and a move length of  $Y$  and the results appear in lexicographic order.



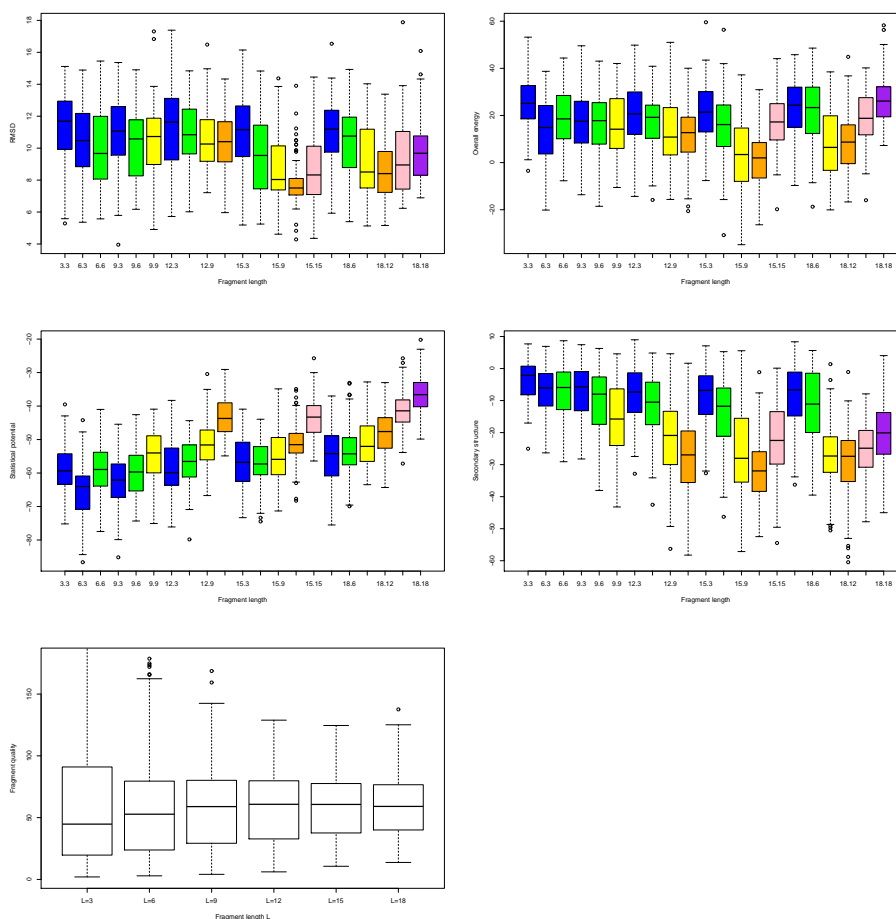

Figure 8: Results for 1urn, showing the distribution of RMSD to the native, overall energy, statistical potential terms, secondary structure terms and the quality of the fragment set. The distributions are shown in the form of box-and-whisker plots (as implemented in R). The center, top and bottom of the box correspond to the median, top and bottom quartile of the distribution, respectively, with the whiskers indicating the minimum and maximum value reached (outliers are indicated by circles). The notation  $X.Y$  is used to label the results for a fragment length of  $X$  and a move length of  $Y$  and the results appear in lexicographic order.

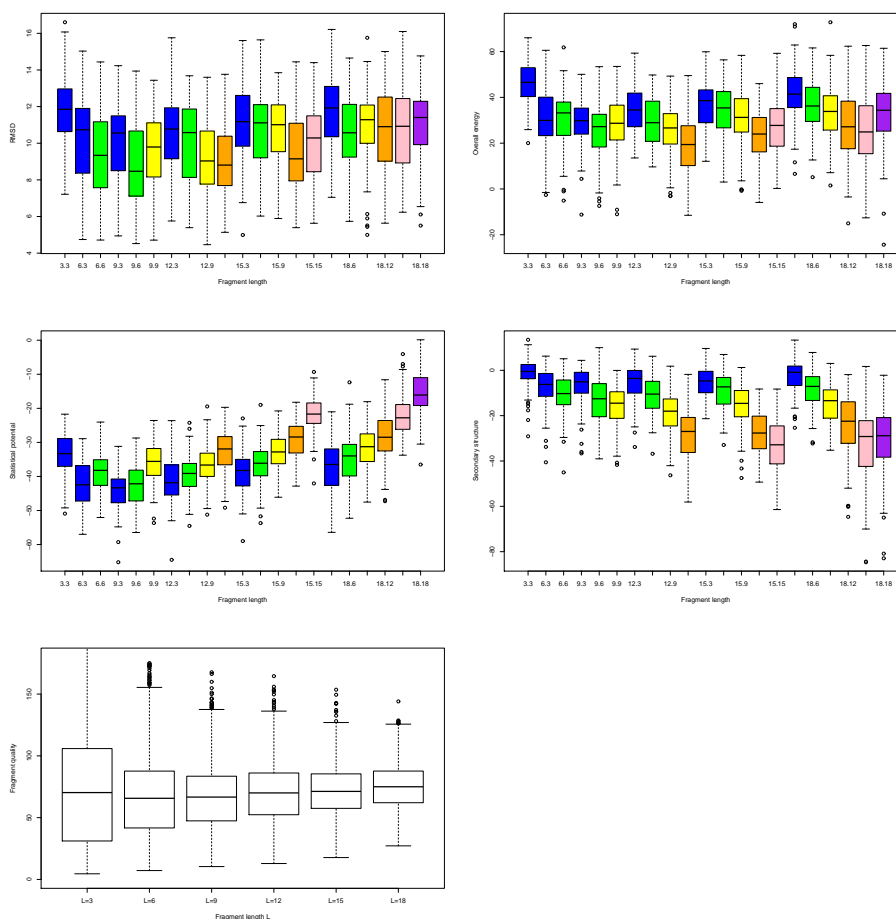

Figure 9: Results for 1vcc, showing the distribution of RMSD to the native, overall energy, statistical potential terms, secondary structure terms and the quality of the fragment set. The distributions are shown in the form of box-and-whisker plots (as implemented in R). The center, top and bottom of the box correspond to the median, top and bottom quartile of the distribution, respectively, with the whiskers indicating the minimum and maximum value reached (outliers are indicated by circles). The notation  $X.Y$  is used to label the results for a fragment length of  $X$  and a move length of  $Y$  and the results appear in lexicographic order.

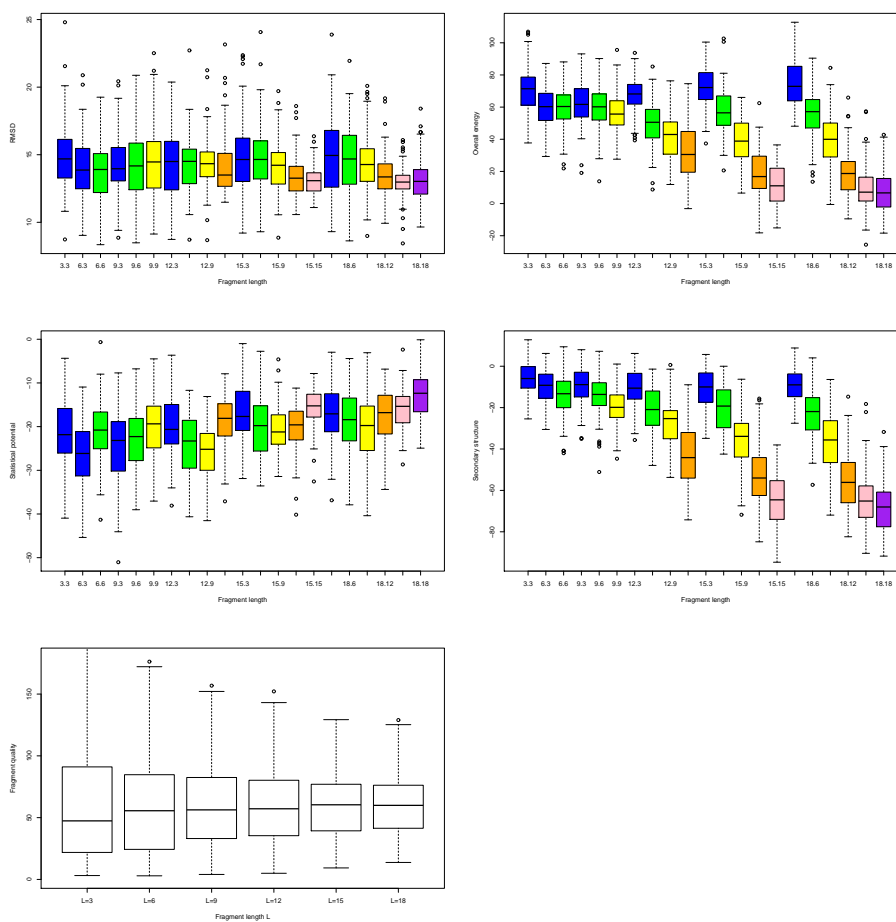

Figure 10: Results for 2acy, showing the distribution of RMSD to the native, overall energy, statistical potential terms, secondary structure terms and the quality of the fragment set. The distributions are shown in the form of box-and-whisker plots (as implemented in R). The center, top and bottom of the box correspond to the median, top and bottom quartile of the distribution, respectively, with the whiskers indicating the minimum and maximum value reached (outliers are indicated by circles). The notation  $X.Y$  is used to label the results for a fragment length of  $X$  and a move length of  $Y$  and the results appear in lexicographic order.

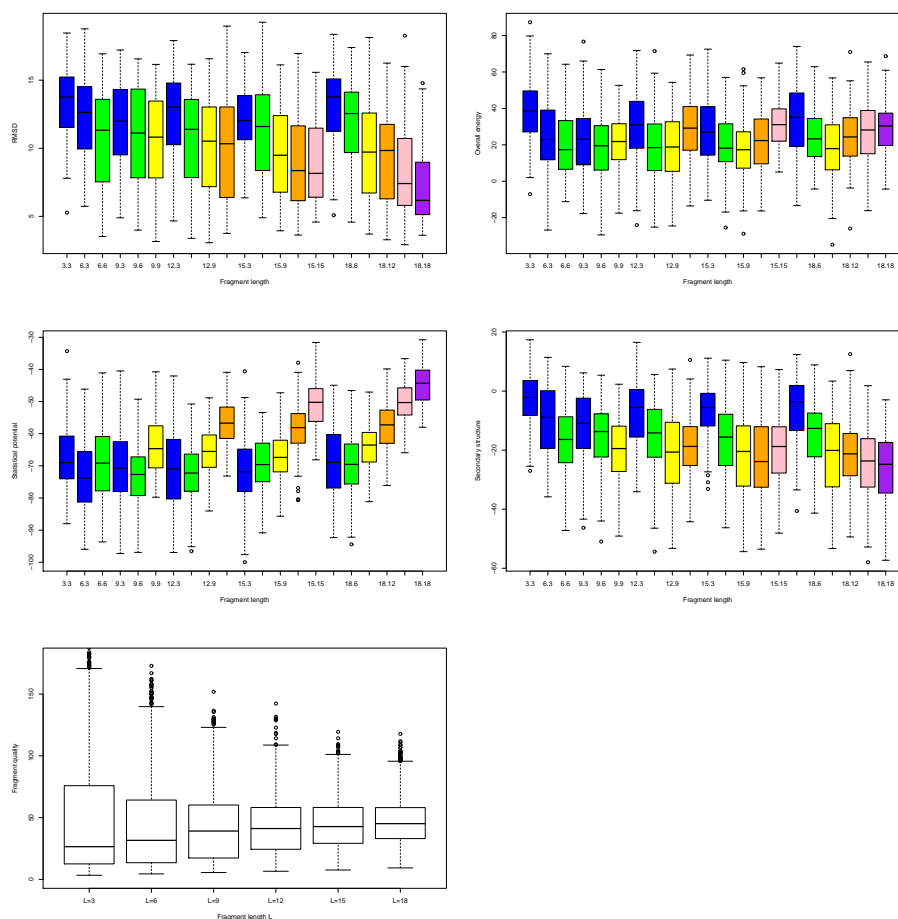

Figure 11: Results for 2chf, showing the distribution of RMSD to the native, overall energy, statistical potential terms, secondary structure terms and the quality of the fragment set. The distributions are shown in the form of box-and-whisker plots (as implemented in R). The center, top and bottom of the box correspond to the median, top and bottom quartile of the distribution, respectively, with the whiskers indicating the minimum and maximum value reached (outliers are indicated by circles). The notation  $X.Y$  is used to label the results for a fragment length of  $X$  and a move length of  $Y$  and the results appear in lexicographic order.

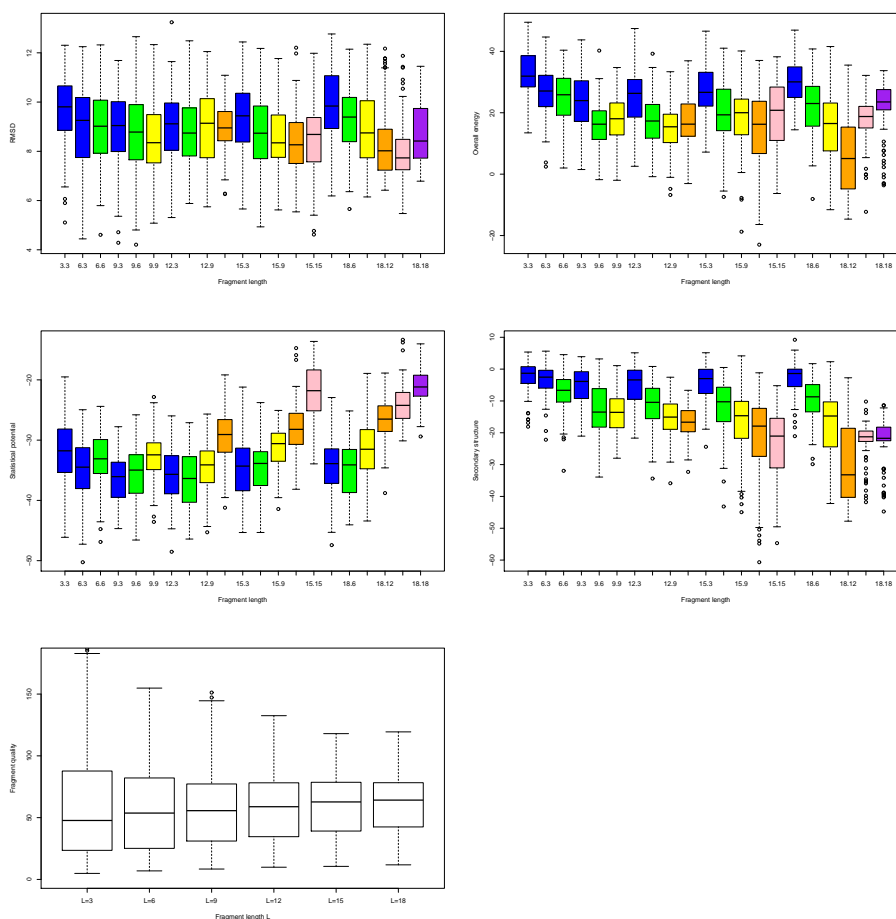

Figure 12: Results for 2ci2, showing the distribution of RMSD to the native, overall energy, statistical potential terms, secondary structure terms and the quality of the fragment set. The distributions are shown in the form of box-and-whisker plots (as implemented in R). The center, top and bottom of the box correspond to the median, top and bottom quartile of the distribution, respectively, with the whiskers indicating the minimum and maximum value reached (outliers are indicated by circles). The notation  $X.Y$  is used to label the results for a fragment length of  $X$  and a move length of  $Y$  and the results appear in lexicographic order.

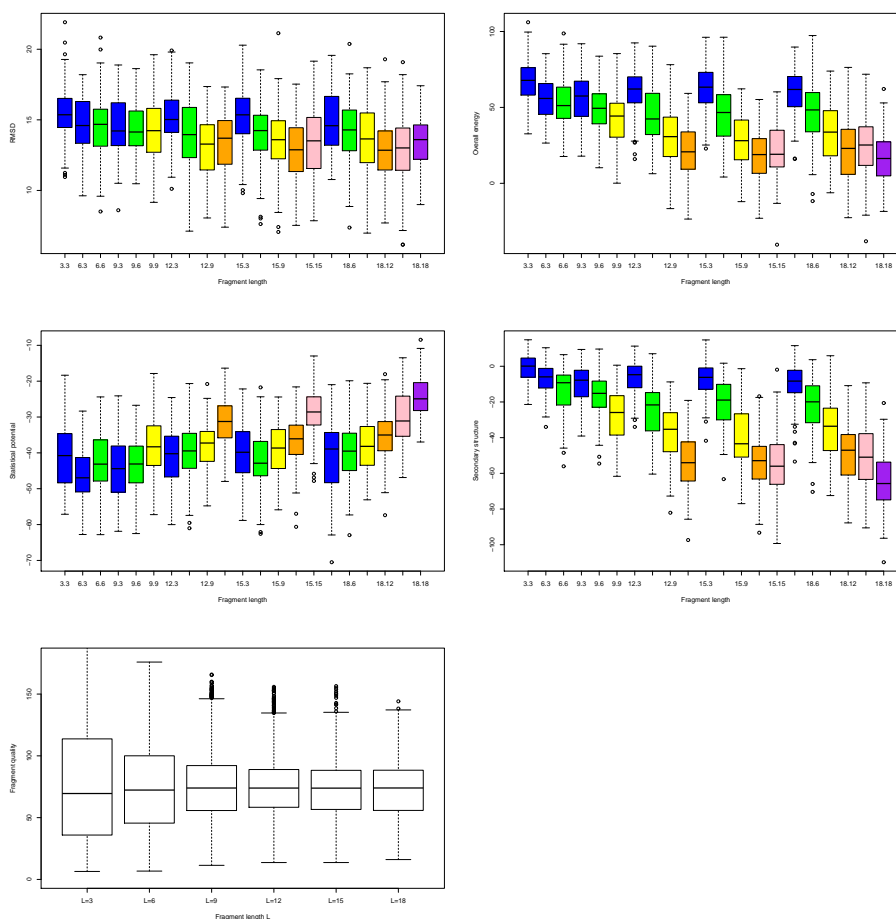

Figure 13: Results for 2vik, showing the distribution of RMSD to the native, overall energy, statistical potential terms, secondary structure terms and the quality of the fragment set. The distributions are shown in the form of box-and-whisker plots (as implemented in R). The center, top and bottom of the box correspond to the median, top and bottom quartile of the distribution, respectively, with the whiskers indicating the minimum and maximum value reached (outliers are indicated by circles). The notation  $X.Y$  is used to label the results for a fragment length of  $X$  and a move length of  $Y$  and the results appear in lexicographic order.

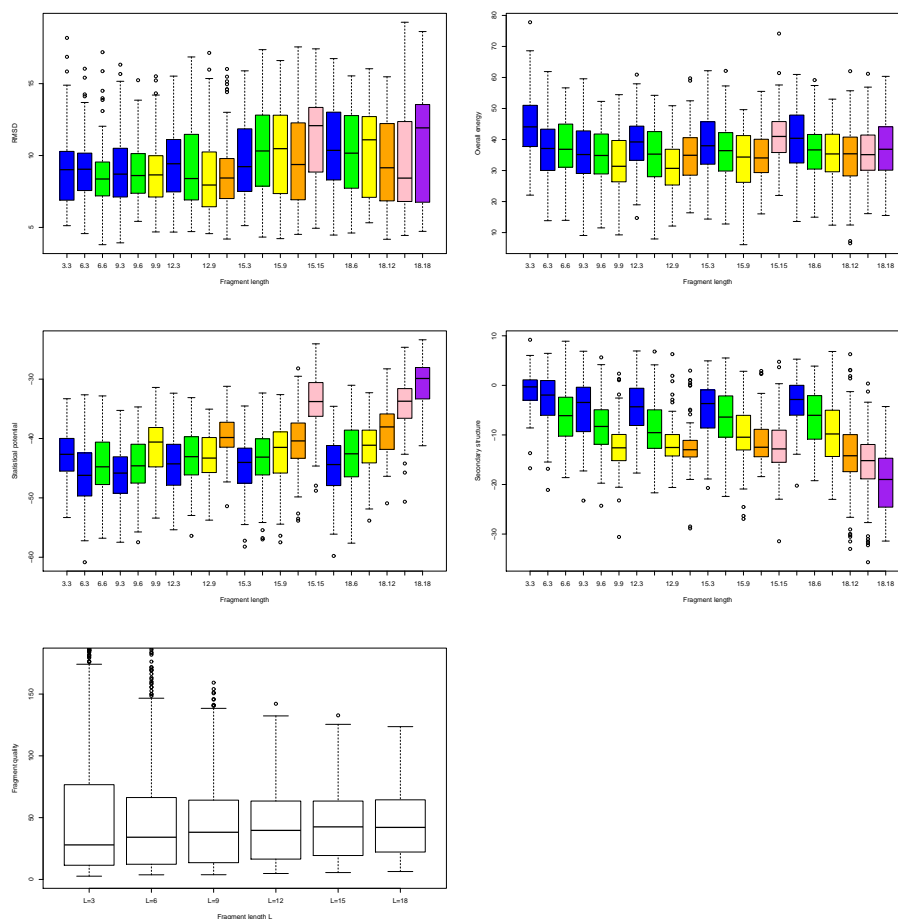

Figure 14: Results for 4ubp, showing the distribution of RMSD to the native, overall energy, statistical potential terms, secondary structure terms and the quality of the fragment set. The distributions are shown in the form of box-and-whisker plots (as implemented in R). The center, top and bottom of the box correspond to the median, top and bottom quartile of the distribution, respectively, with the whiskers indicating the minimum and maximum value reached (outliers are indicated by circles). The notation  $X.Y$  is used to label the results for a fragment length of  $X$  and a move length of  $Y$  and the results appear in lexicographic order.

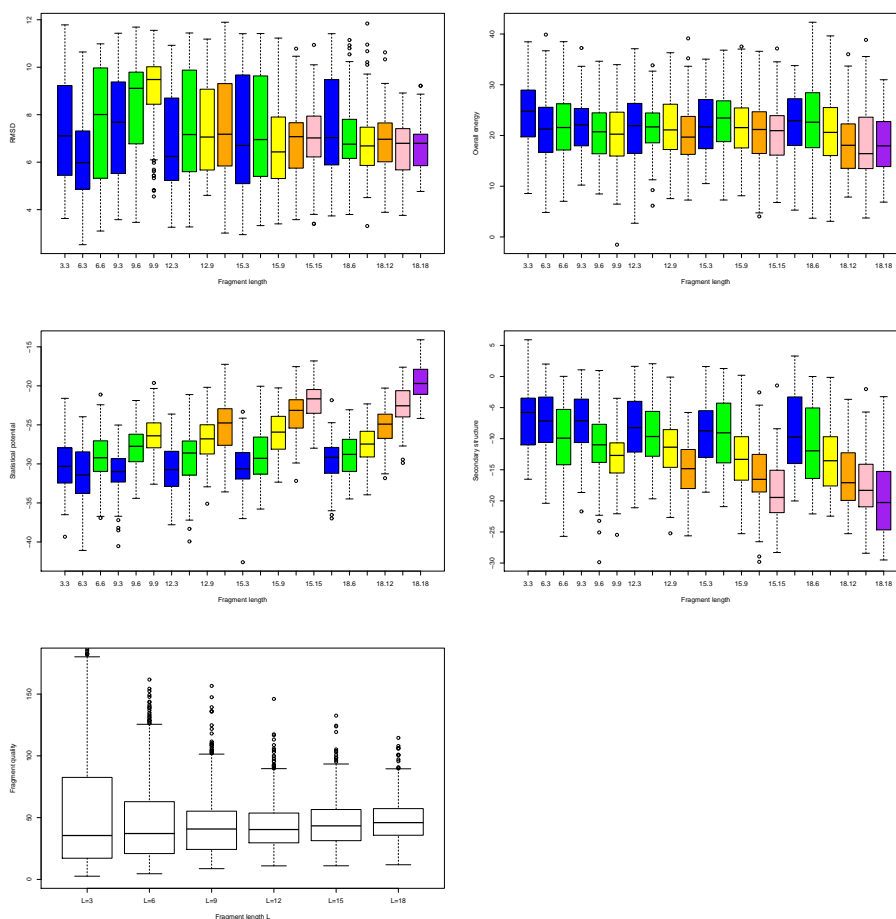

Figure 15: Results for 5cro, showing the distribution of RMSD to the native, overall energy, statistical potential terms, secondary structure terms and the quality of the fragment set. The distributions are shown in the form of box-and-whisker plots (as implemented in R). The center, top and bottom of the box correspond to the median, top and bottom quartile of the distribution, respectively, with the whiskers indicating the minimum and maximum value reached (outliers are indicated by circles). The notation  $X.Y$  is used to label the results for a fragment length of  $X$  and a move length of  $Y$  and the results appear in lexicographic order.
