# Supplementary material
Source: PubMed Central journal article supplement (PMC3849216)
Supplement: NIHMS446763-supplement-Supplementary_Data_3.pdf [file NIHMS446763-supplement-Supplementary_Data_3.pdf]

# 1 Alpha-beta proteins

1. 1a19
2. 1acf
3. 1aiu
4. 1b3a
5. 1bm8
6. 1cc8
7. 1ctf
8. 1dhn
9. 1ew4
10. 1fkb
11. 1hz6
12. 1iib
13. 1kpe
14. 1lou
15. 1nps
16. 1opd
17. 1pgx

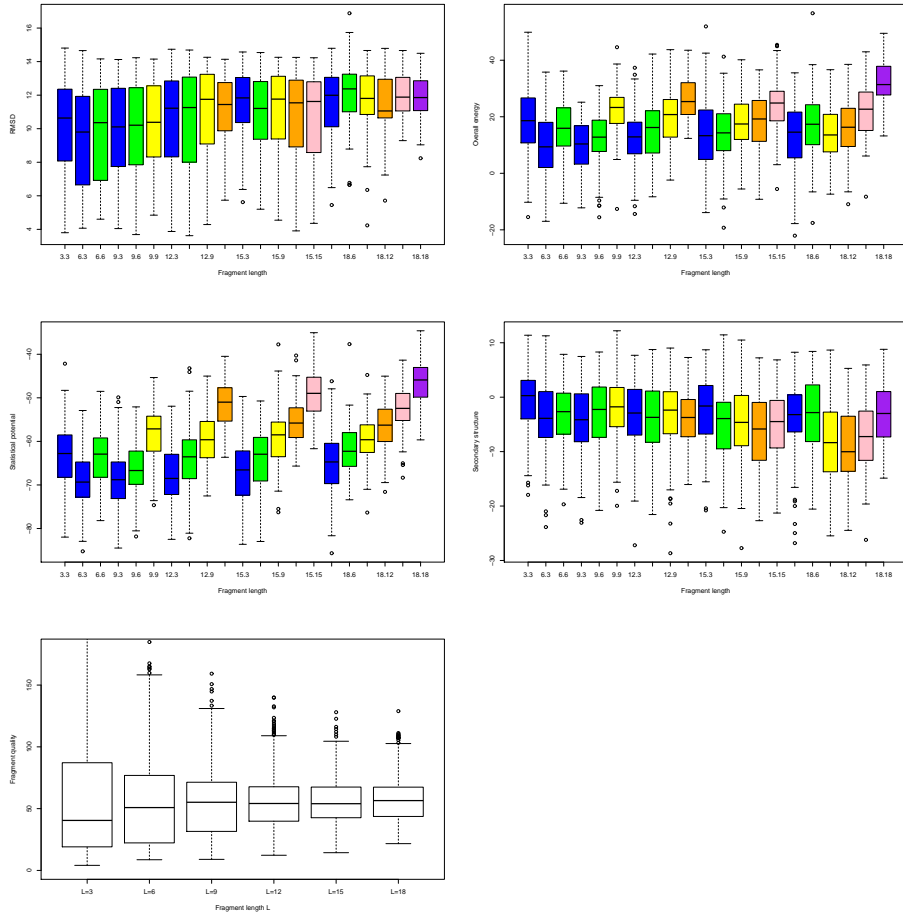

Figure 1: Results for 1a19, showing the distribution of RMSD to the native, overall energy, statistical potential terms, secondary structure terms and the quality of the fragment set. The distributions are shown in the form of box-and-whisker plots (as implemented in R). The center, top and bottom of the box correspond to the median, top and bottom quartile of the distribution, respectively, with the whiskers indicating the minimum and maximum value reached (outliers are indicated by circles). The notation  $X.Y$  is used to label the results for a fragment length of  $X$  and a move length of  $Y$  and the results appear in lexicographic order.

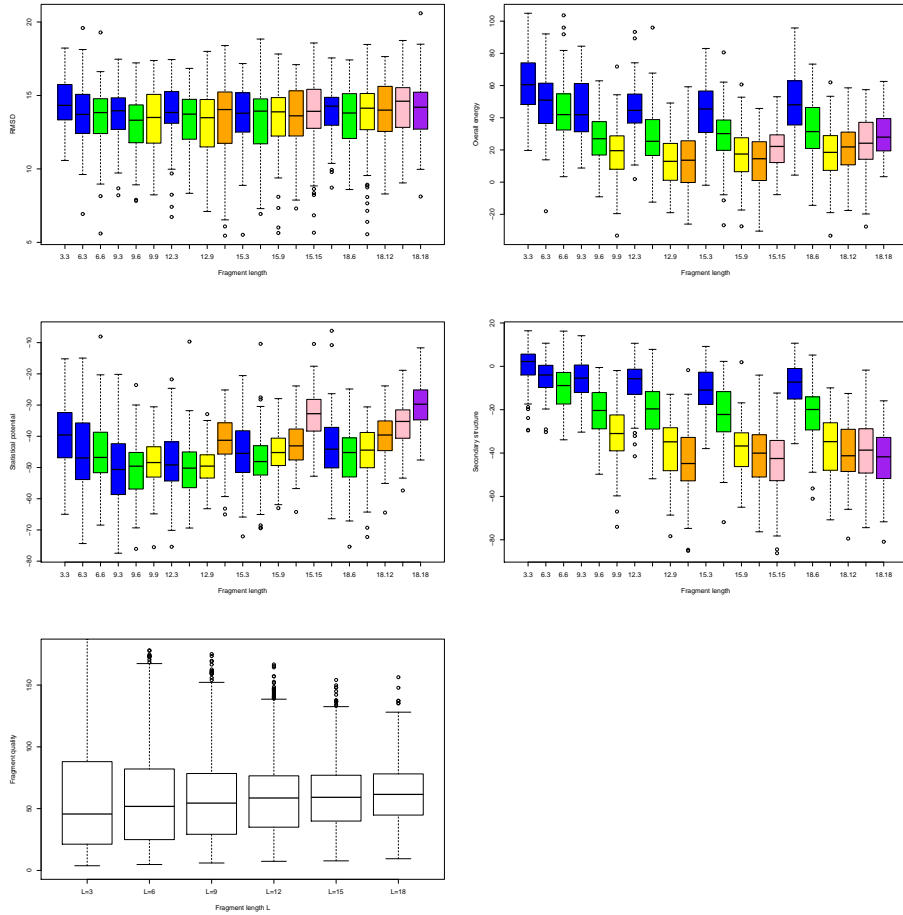

Figure 2: Results for 1acf, showing the distribution of RMSD to the native, overall energy, statistical potential terms, secondary structure terms and the quality of the fragment set. The distributions are shown in the form of box-and-whisker plots (as implemented in R). The center, top and bottom of the box correspond to the median, top and bottom quartile of the distribution, respectively, with the whiskers indicating the minimum and maximum value reached (outliers are indicated by circles). The notation  $X.Y$  is used to label the results for a fragment length of  $X$  and a move length of  $Y$  and the results appear in lexicographic order.

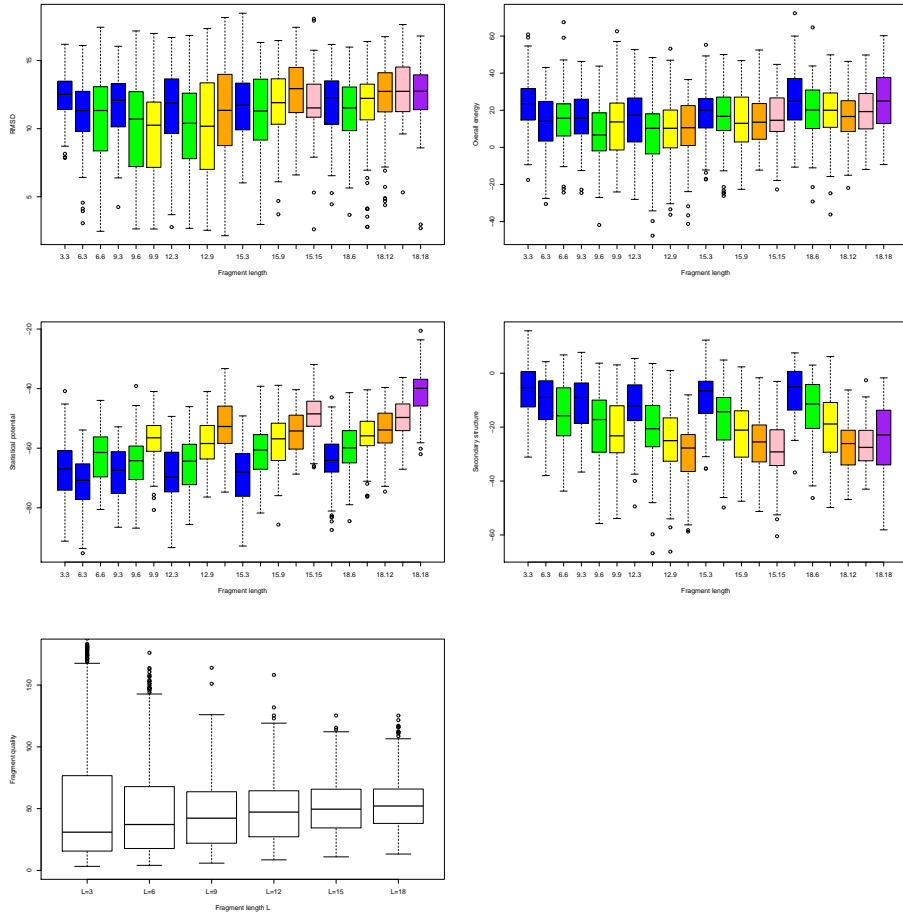

Figure 3: Results for 1aiu, showing the distribution of RMSD to the native, overall energy, statistical potential terms, secondary structure terms and the quality of the fragment set. The distributions are shown in the form of box-and-whisker plots (as implemented in R). The center, top and bottom of the box correspond to the median, top and bottom quartile of the distribution, respectively, with the whiskers indicating the minimum and maximum value reached (outliers are indicated by circles). The notation  $X.Y$  is used to label the results for a fragment length of  $X$  and a move length of  $Y$  and the results appear in lexicographic order.



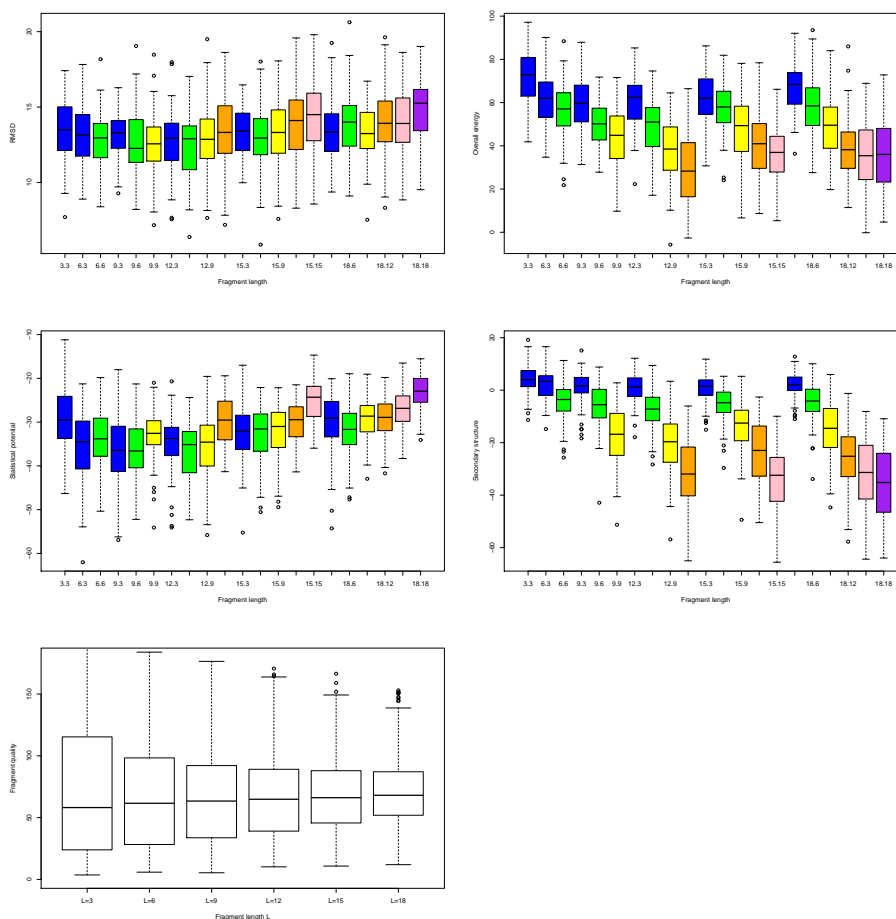

Figure 5: Results for 1bm8, showing the distribution of RMSD to the native, overall energy, statistical potential terms, secondary structure terms and the quality of the fragment set. The distributions are shown in the form of box-and-whisker plots (as implemented in R). The center, top and bottom of the box correspond to the median, top and bottom quartile of the distribution, respectively, with the whiskers indicating the minimum and maximum value reached (outliers are indicated by circles). The notation  $X.Y$  is used to label the results for a fragment length of  $X$  and a move length of  $Y$  and the results appear in lexicographic order.

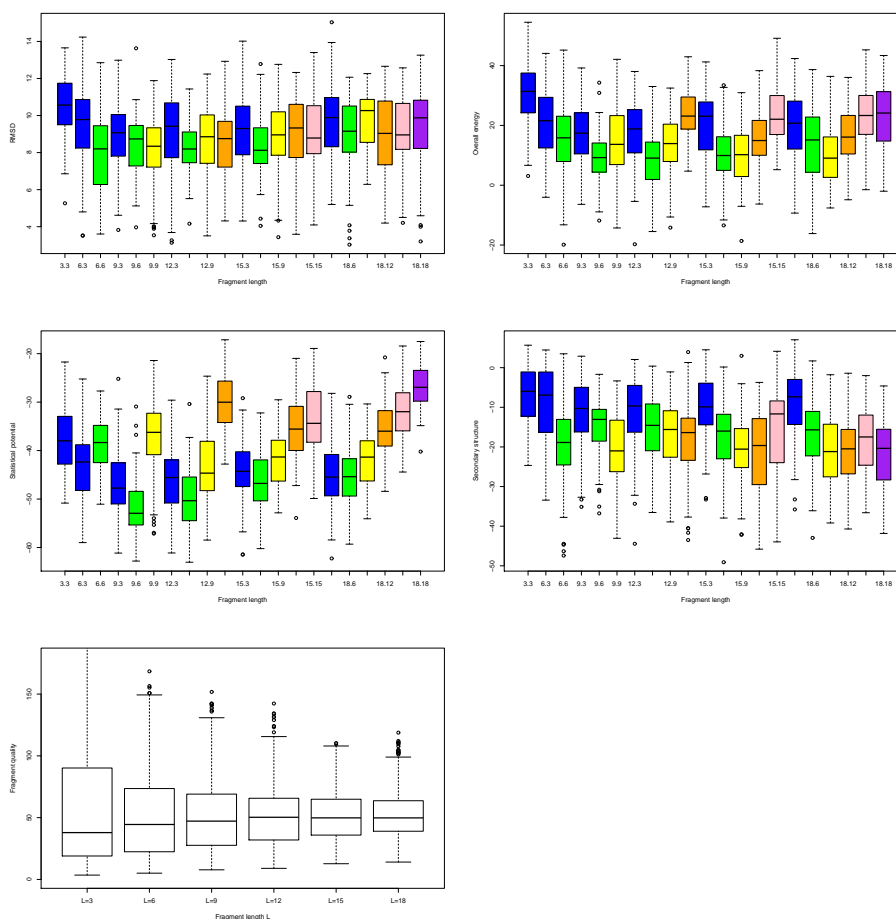

Figure 6: Results for 1cc8, showing the distribution of RMSD to the native, overall energy, statistical potential terms, secondary structure terms and the quality of the fragment set. The distributions are shown in the form of box-and-whisker plots (as implemented in R). The center, top and bottom of the box correspond to the median, top and bottom quartile of the distribution, respectively, with the whiskers indicating the minimum and maximum value reached (outliers are indicated by circles). The notation  $X.Y$  is used to label the results for a fragment length of  $X$  and a move length of  $Y$  and the results appear in lexicographic order.

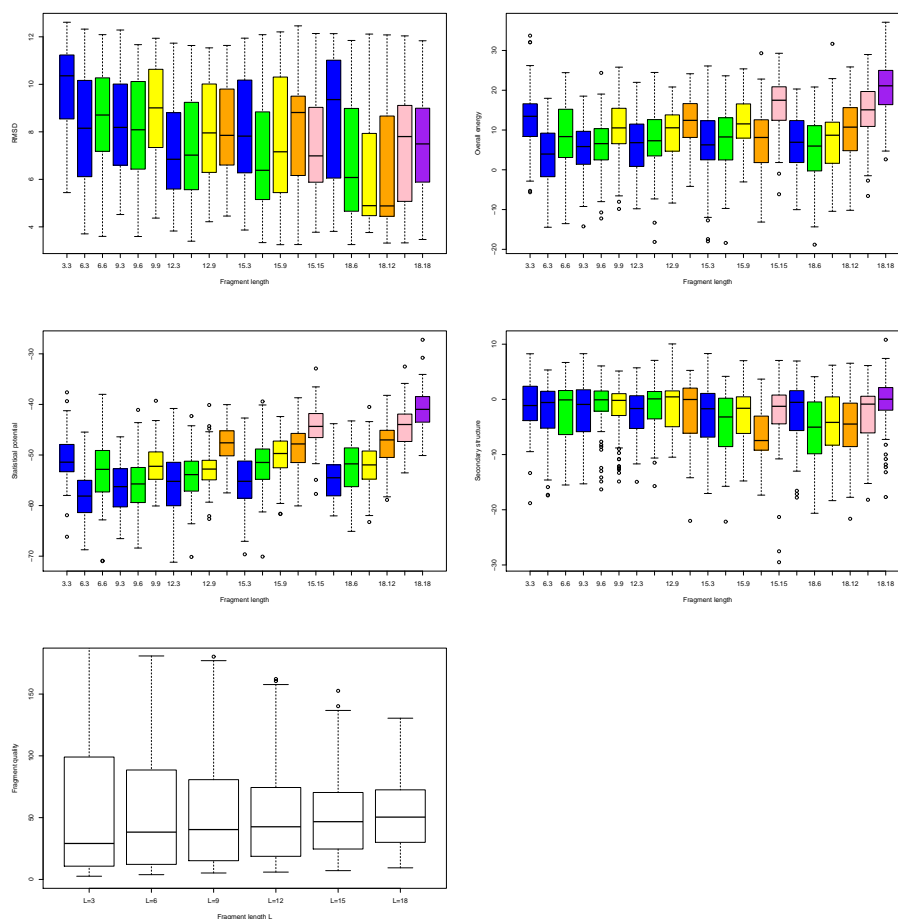

Figure 7: Results for 1ctf, showing the distribution of RMSD to the native, overall energy, statistical potential terms, secondary structure terms and the quality of the fragment set. The distributions are shown in the form of box-and-whisker plots (as implemented in R). The center, top and bottom of the box correspond to the median, top and bottom quartile of the distribution, respectively, with the whiskers indicating the minimum and maximum value reached (outliers are indicated by circles). The notation  $X.Y$  is used to label the results for a fragment length of  $X$  and a move length of  $Y$  and the results appear in lexicographic order.



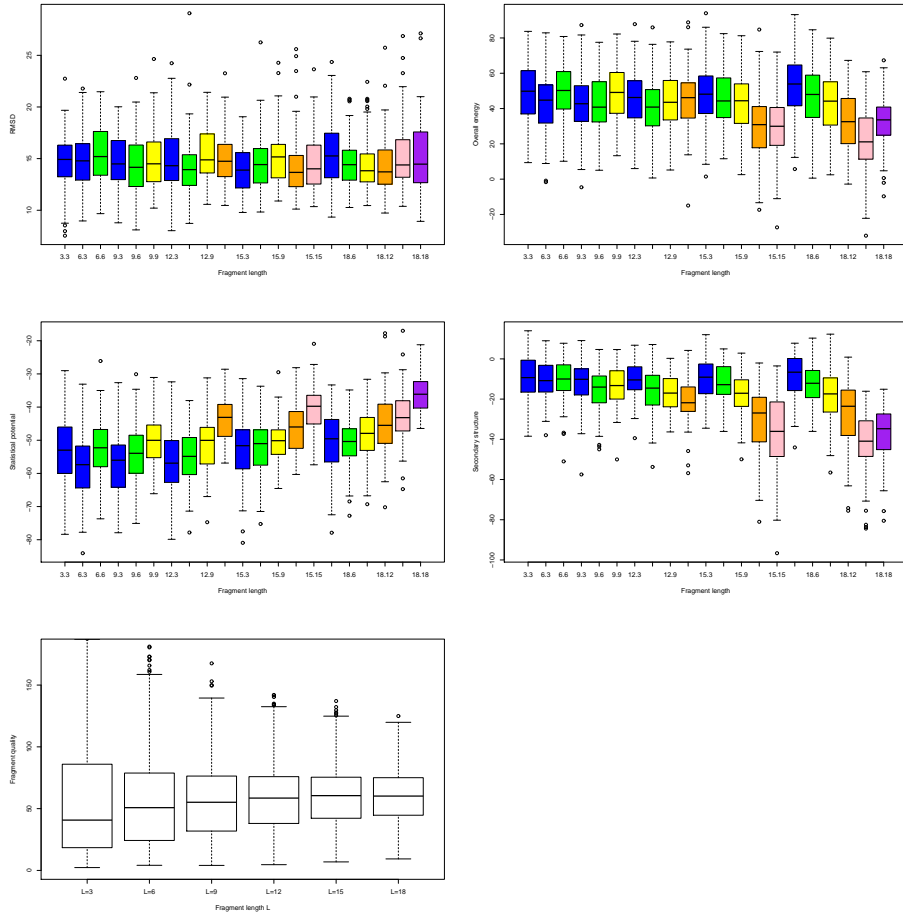

Figure 8: Results for 1dhn, showing the distribution of RMSD to the native, overall energy, statistical potential terms, secondary structure terms and the quality of the fragment set. The distributions are shown in the form of box-and-whisker plots (as implemented in R). The center, top and bottom of the box correspond to the median, top and bottom quartile of the distribution, respectively, with the whiskers indicating the minimum and maximum value reached (outliers are indicated by circles). The notation  $X.Y$  is used to label the results for a fragment length of  $X$  and a move length of  $Y$  and the results appear in lexicographic order.

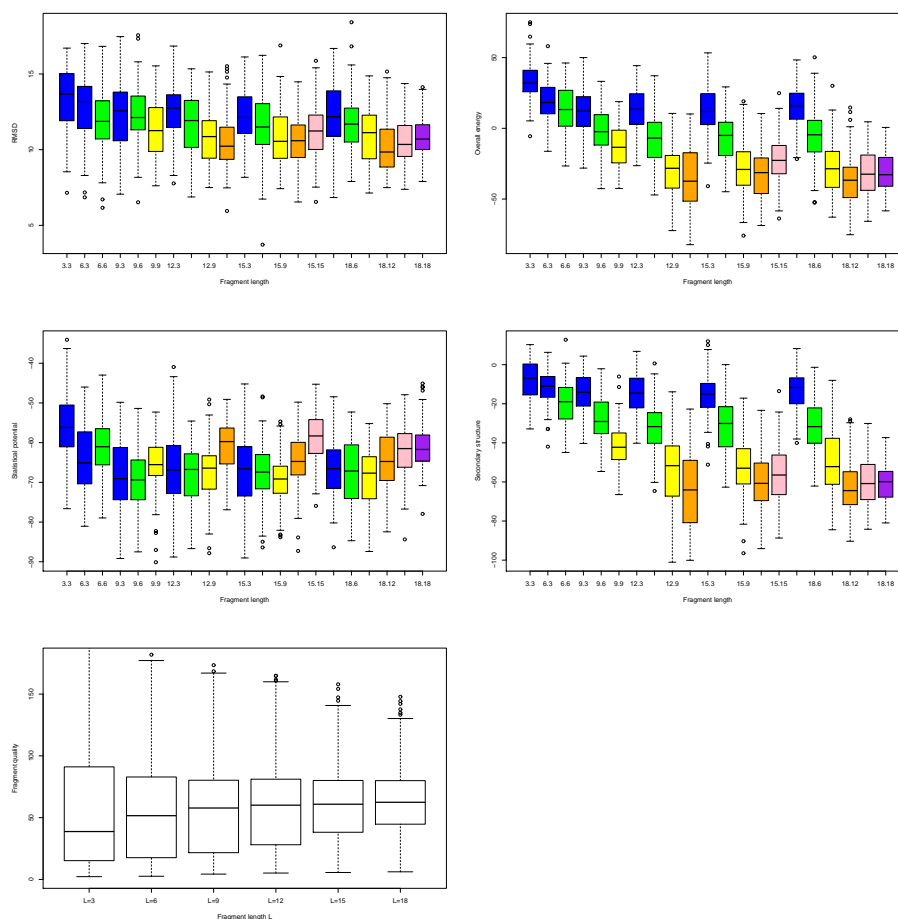

Figure 9: Results for 1ew4, showing the distribution of RMSD to the native, overall energy, statistical potential terms, secondary structure terms and the quality of the fragment set. The distributions are shown in the form of box-and-whisker plots (as implemented in R). The center, top and bottom of the box correspond to the median, top and bottom quartile of the distribution, respectively, with the whiskers indicating the minimum and maximum value reached (outliers are indicated by circles). The notation  $X.Y$  is used to label the results for a fragment length of  $X$  and a move length of  $Y$  and the results appear in lexicographic order.

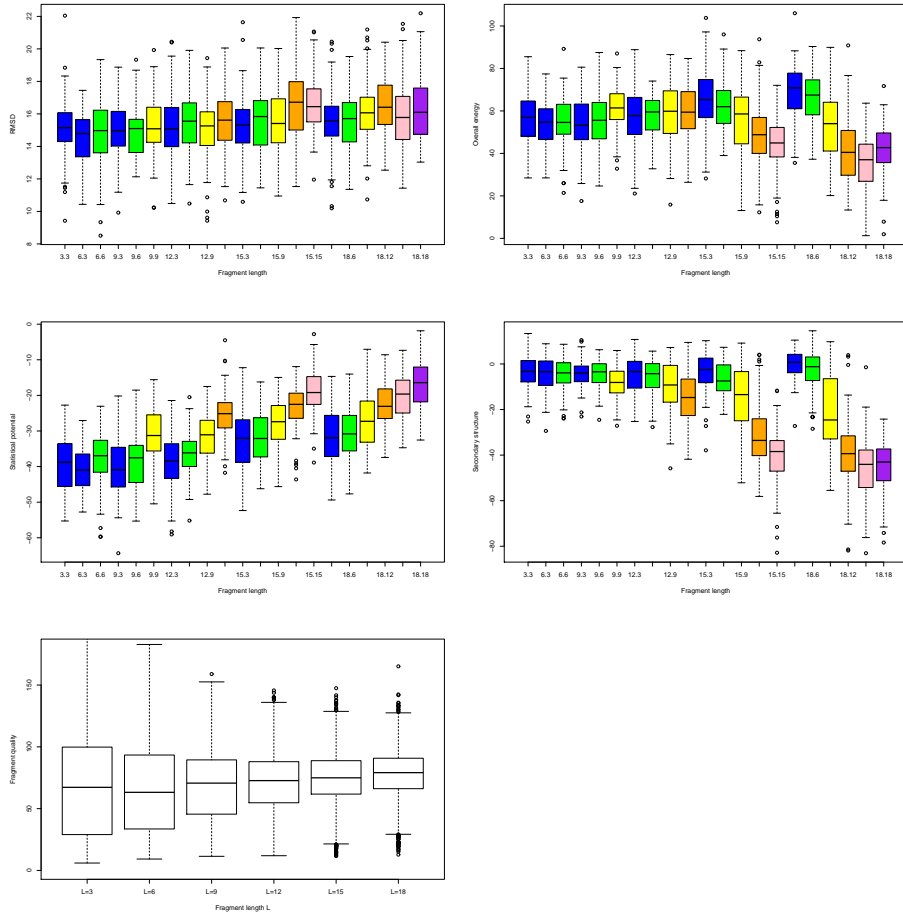

Figure 10: Results for 1kfb, showing the distribution of RMSD to the native, overall energy, statistical potential terms, secondary structure terms and the quality of the fragment set. The distributions are shown in the form of box-and-whisker plots (as implemented in R). The center, top and bottom of the box correspond to the median, top and bottom quartile of the distribution, respectively, with the whiskers indicating the minimum and maximum value reached (outliers are indicated by circles). The notation  $X.Y$  is used to label the results for a fragment length of  $X$  and a move length of  $Y$  and the results appear in lexicographic order.

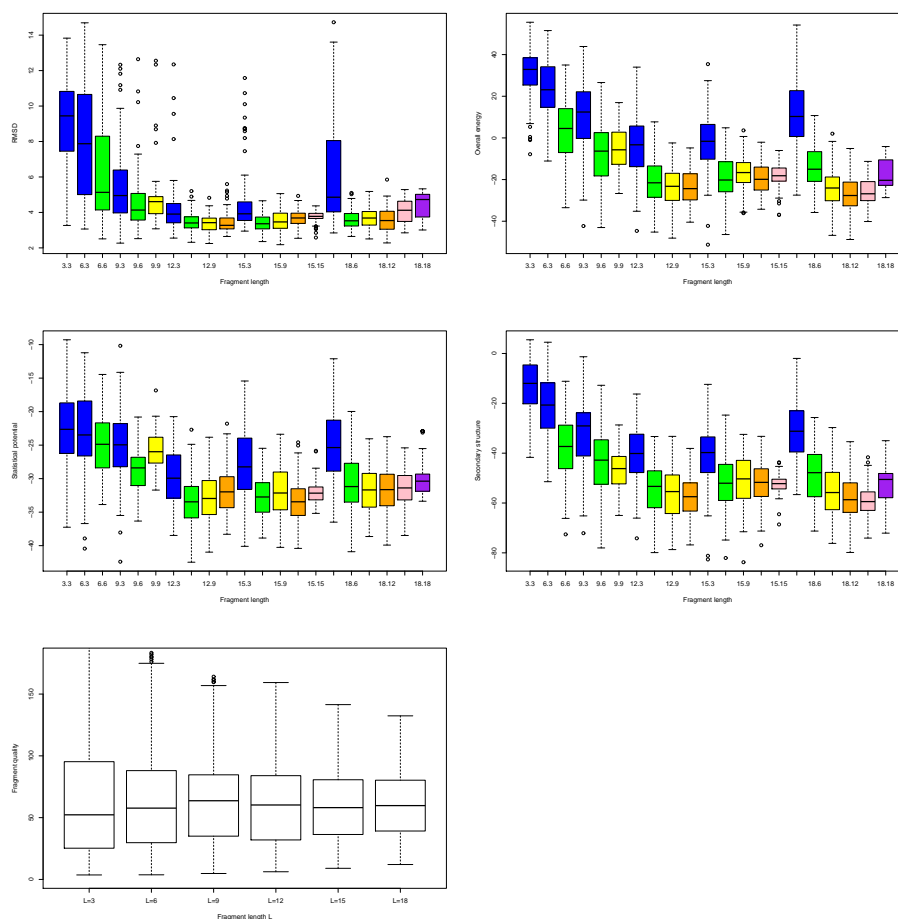

Figure 11: Results for 1hz6, showing the distribution of RMSD to the native, overall energy, statistical potential terms, secondary structure terms and the quality of the fragment set. The distributions are shown in the form of box-and-whisker plots (as implemented in R). The center, top and bottom of the box correspond to the median, top and bottom quartile of the distribution, respectively, with the whiskers indicating the minimum and maximum value reached (outliers are indicated by circles). The notation  $X.Y$  is used to label the results for a fragment length of  $X$  and a move length of  $Y$  and the results appear in lexicographic order.

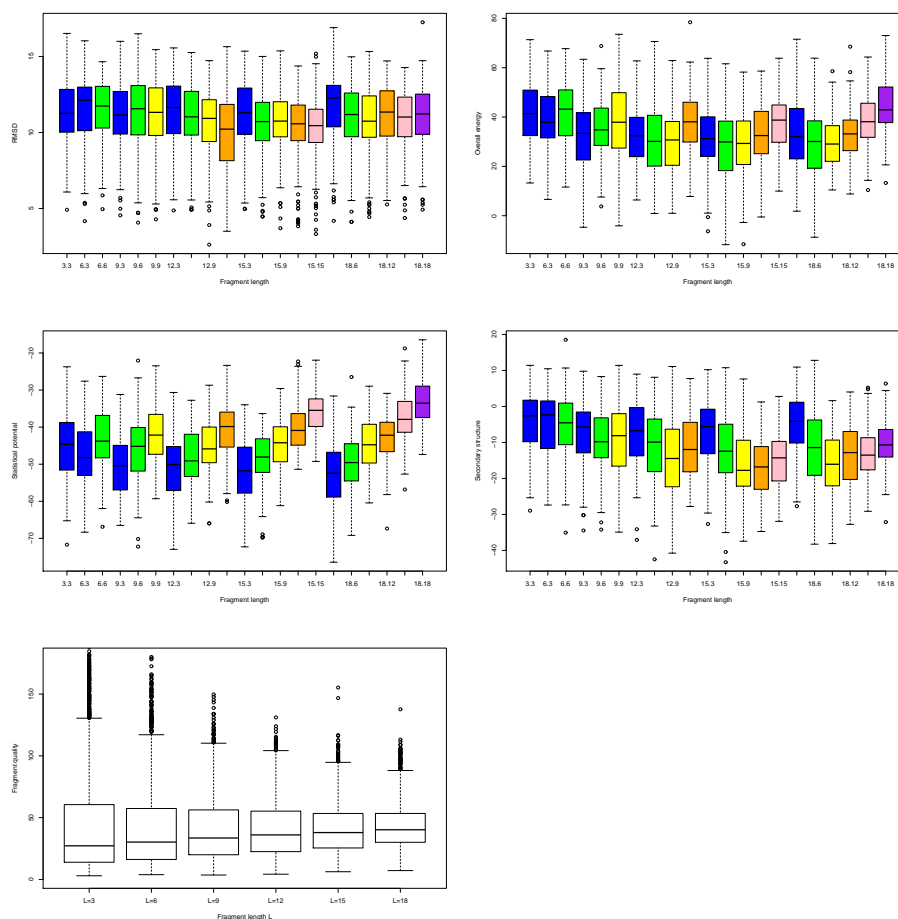

Figure 12: Results for 1iib, showing the distribution of RMSD to the native, overall energy, statistical potential terms, secondary structure terms and the quality of the fragment set. The distributions are shown in the form of box-and-whisker plots (as implemented in R). The center, top and bottom of the box correspond to the median, top and bottom quartile of the distribution, respectively, with the whiskers indicating the minimum and maximum value reached (outliers are indicated by circles). The notation  $X.Y$  is used to label the results for a fragment length of  $X$  and a move length of  $Y$  and the results appear in lexicographic order.

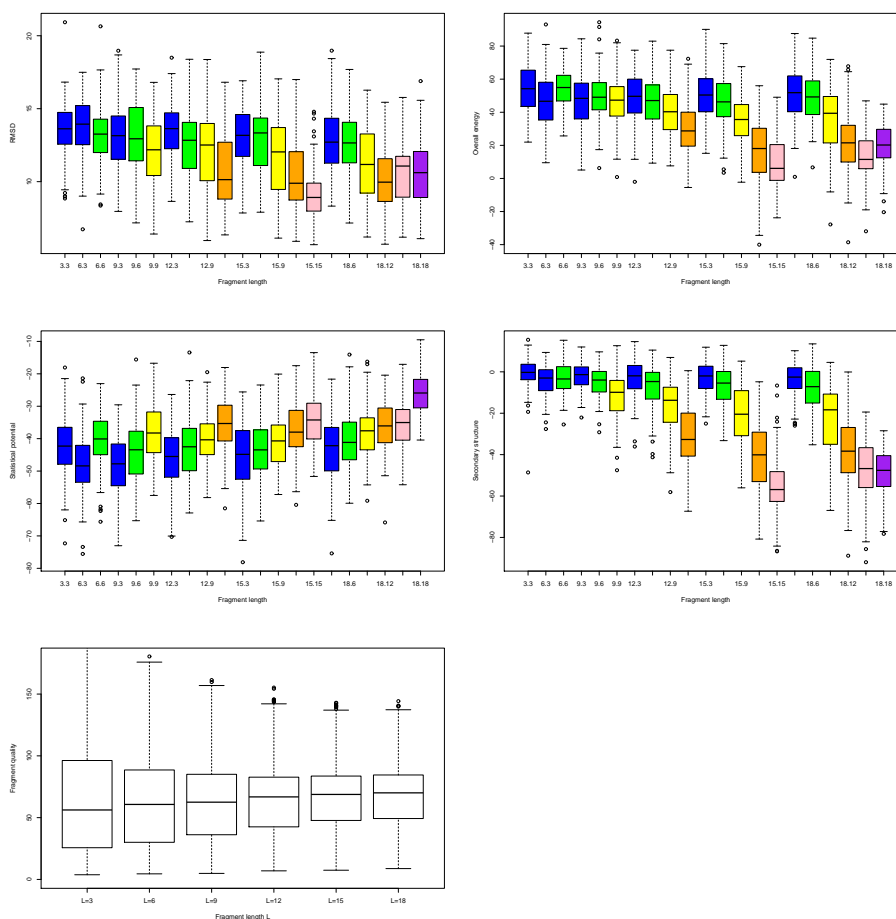

Figure 13: Results for 1kpe, showing the distribution of RMSD to the native, overall energy, statistical potential terms, secondary structure terms and the quality of the fragment set. The distributions are shown in the form of box-and-whisker plots (as implemented in R). The center, top and bottom of the box correspond to the median, top and bottom quartile of the distribution, respectively, with the whiskers indicating the minimum and maximum value reached (outliers are indicated by circles). The notation  $X.Y$  is used to label the results for a fragment length of  $X$  and a move length of  $Y$  and the results appear in lexicographic order.

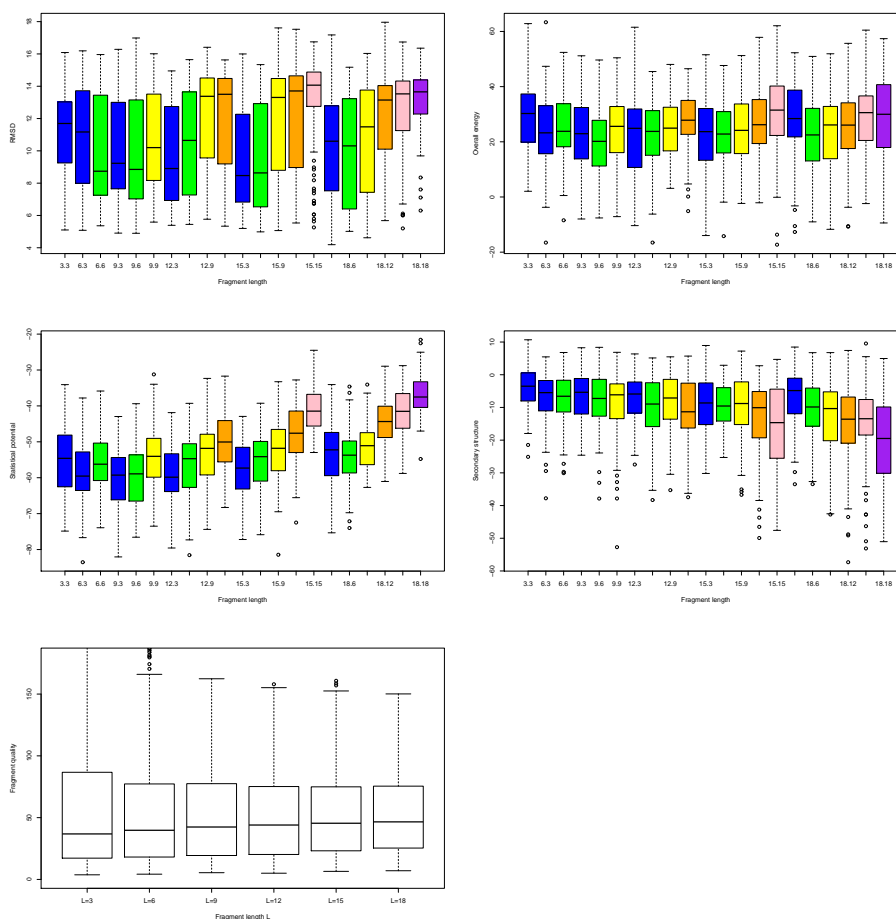

Figure 14: Results for 11ou, showing the distribution of RMSD to the native, overall energy, statistical potential terms, secondary structure terms and the quality of the fragment set. The distributions are shown in the form of box-and-whisker plots (as implemented in R). The center, top and bottom of the box correspond to the median, top and bottom quartile of the distribution, respectively, with the whiskers indicating the minimum and maximum value reached (outliers are indicated by circles). The notation  $X.Y$  is used to label the results for a fragment length of  $X$  and a move length of  $Y$  and the results appear in lexicographic order.

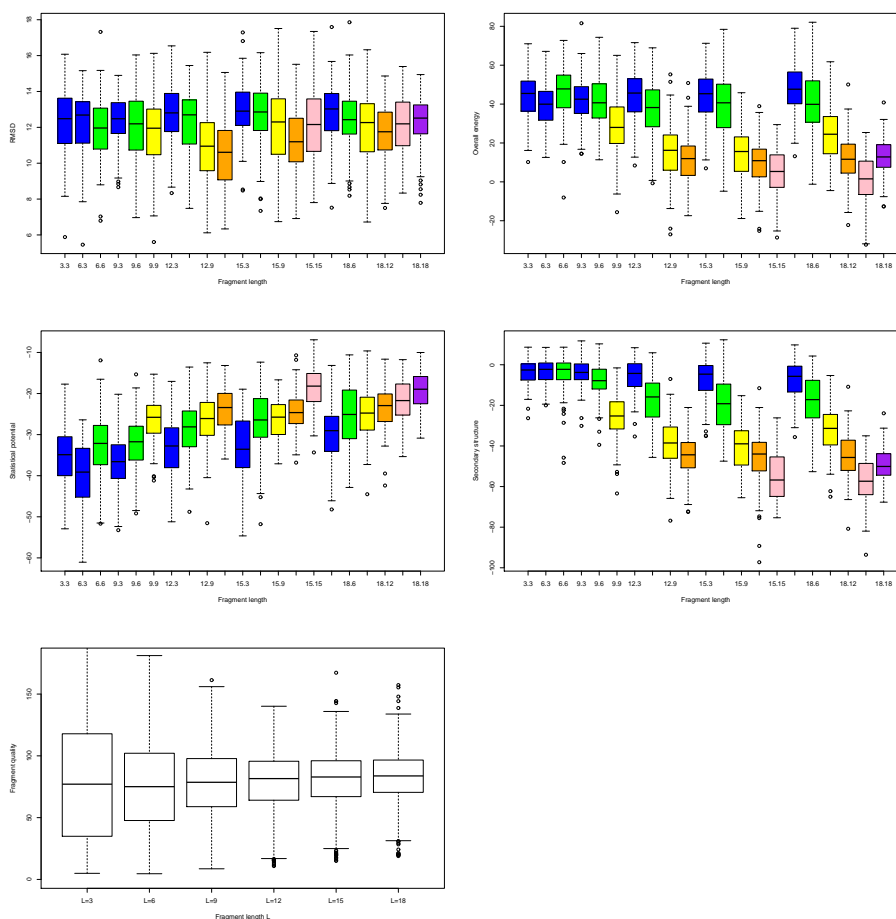

Figure 15: Results for 1nps, showing the distribution of RMSD to the native, overall energy, statistical potential terms, secondary structure terms and the quality of the fragment set. The distributions are shown in the form of box-and-whisker plots (as implemented in R). The center, top and bottom of the box correspond to the median, top and bottom quartile of the distribution, respectively, with the whiskers indicating the minimum and maximum value reached (outliers are indicated by circles). The notation  $X.Y$  is used to label the results for a fragment length of  $X$  and a move length of  $Y$  and the results appear in lexicographic order.



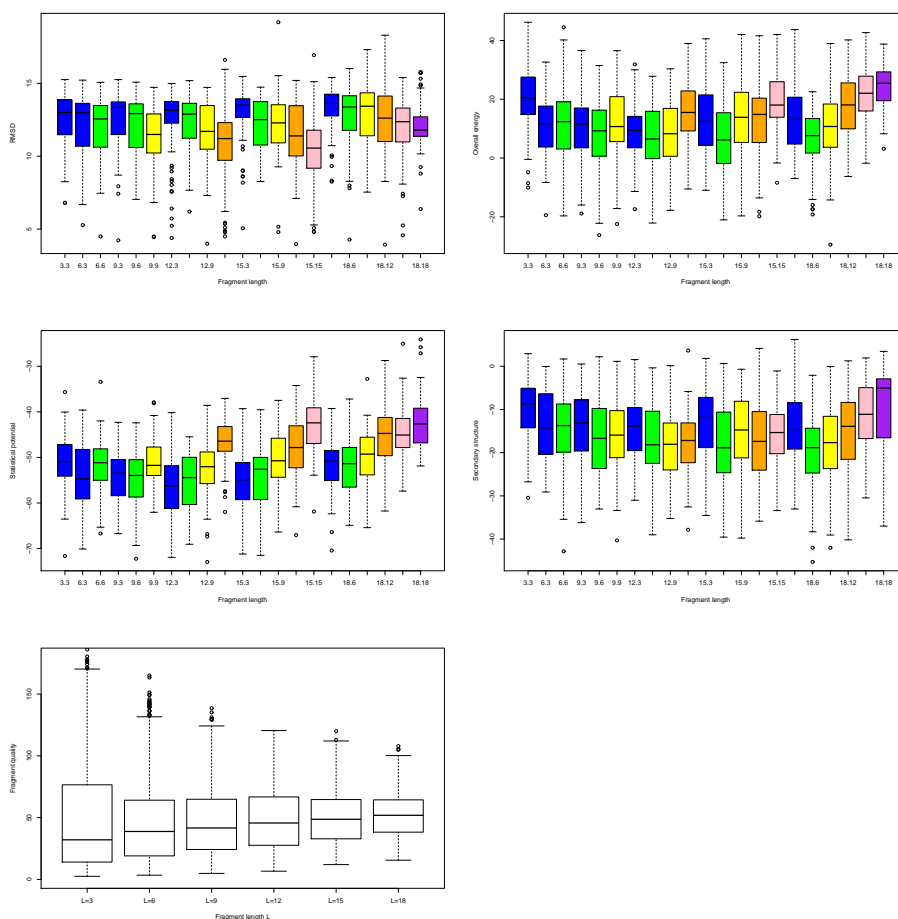

Figure 16: Results for 1opd, showing the distribution of RMSD to the native, overall energy, statistical potential terms, secondary structure terms. The distributions are shown in the form of box-and-whisker plots (as implemented in R). The center, top and bottom of the box correspond to the median, top and bottom quartile of the distribution, respectively, with the whiskers indicating the minimum and maximum value reached (outliers are indicated by circles). The notation  $X.Y$  is used to label the results for a fragment length of  $X$  and a move length of  $Y$  and the results appear in lexicographic order.

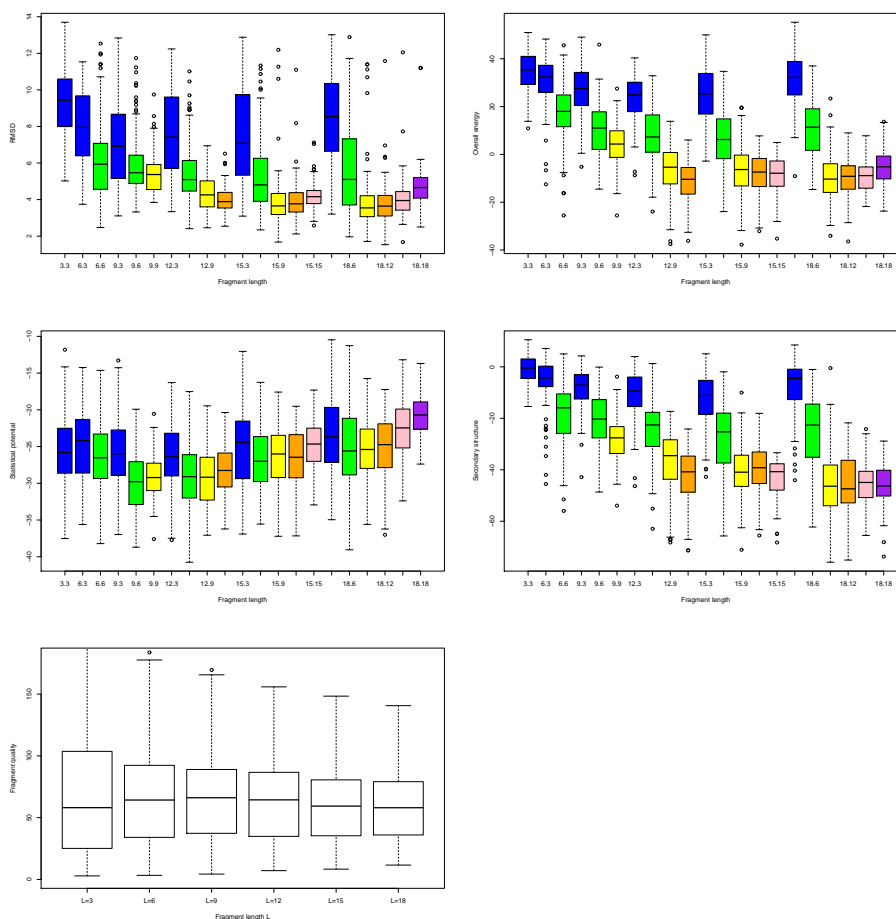

Figure 17: Results for 1pgx, showing the distribution of RMSD to the native, overall energy, statistical potential terms, secondary structure terms and the quality of the fragment set. The distributions are shown in the form of box-and-whisker plots (as implemented in R). The center, top and bottom of the box correspond to the median, top and bottom quartile of the distribution, respectively, with the whiskers indicating the minimum and maximum value reached (outliers are indicated by circles). The notation  $X.Y$  is used to label the results for a fragment length of  $X$  and a move length of  $Y$  and the results appear in lexicographic order.
