# Supplementary material
Source: PubMed Central journal article supplement (PMC3849216)
Supplement: NIHMS446763-supplement-Supplementary_Data_4.pdf [file NIHMS446763-supplement-Supplementary_Data_4.pdf]

## 1 Beta proteins

1. 1bk2
2. 1bq9
3. 1c8c
4. 1c9o
5. 1fna
6. 1gvp
7. 1shf
8. 1ten
9. 1tit
10. 1tul
11. 1vie
12. 1who
13. 1wit

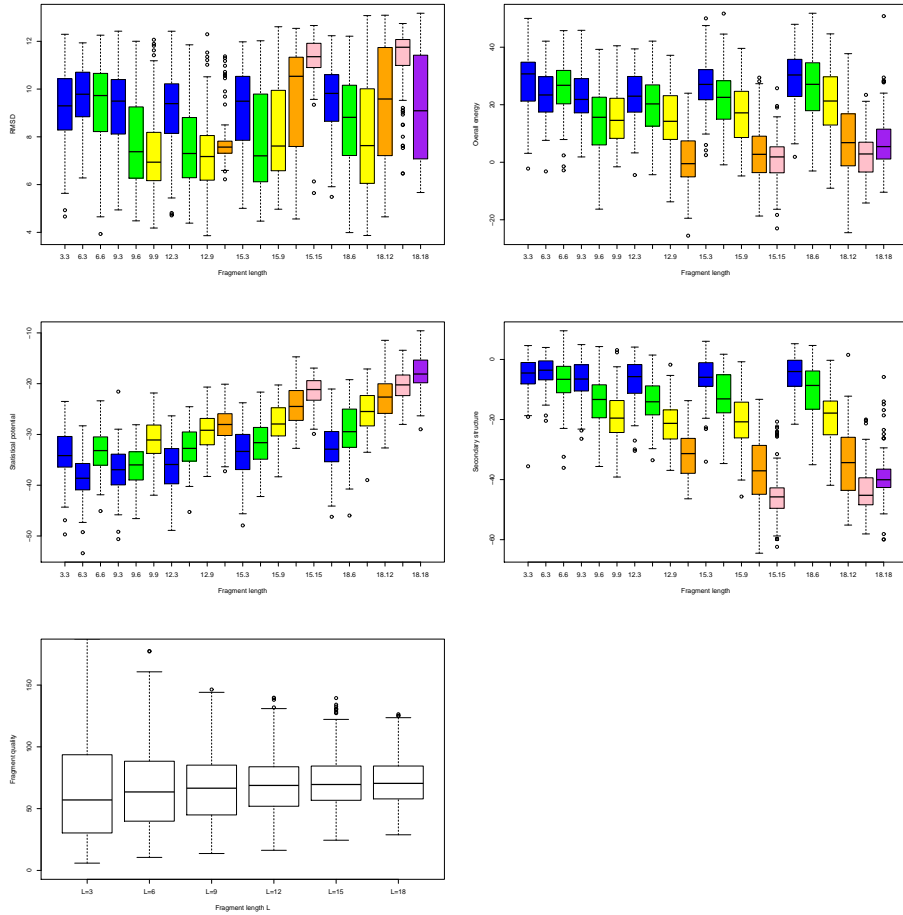

Figure 1: Results for 1bk2, showing the distribution of RMSD to the native, overall energy, statistical potential terms, secondary structure terms and the quality of the fragment set. The distributions are shown in the form of box-and-whisker plots (as implemented in R). The center, top and bottom of the box correspond to the median, top and bottom quartile of the distribution, respectively, with the whiskers indicating the minimum and maximum value reached (outliers are indicated by circles). The notation  $X.Y$  is used to label the results for a fragment length of  $X$  and a move length of  $Y$  and the results appear in lexicographic order.

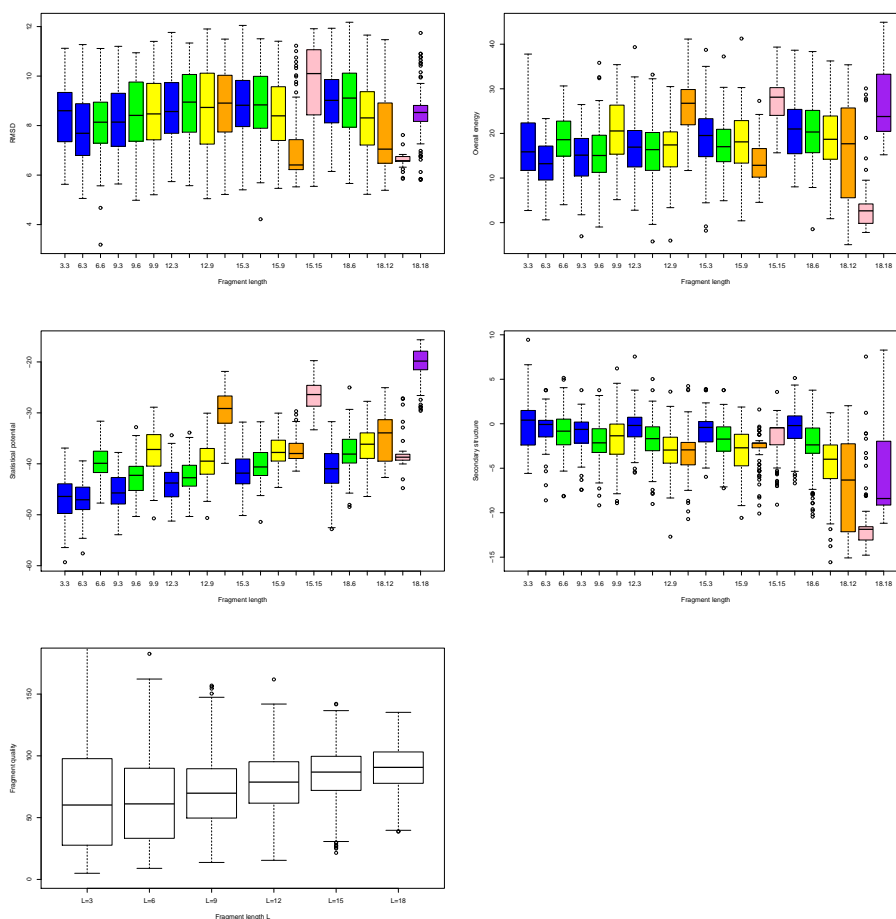

Figure 2: Results for 1bq9, showing the distribution of RMSD to the native, overall energy, statistical potential terms, secondary structure terms and the quality of the fragment set. The distributions are shown in the form of box-and-whisker plots (as implemented in R). The center, top and bottom of the box correspond to the median, top and bottom quartile of the distribution, respectively, with the whiskers indicating the minimum and maximum value reached (outliers are indicated by circles). The notation  $X.Y$  is used to label the results for a fragment length of  $X$  and a move length of  $Y$  and the results appear in lexicographic order.

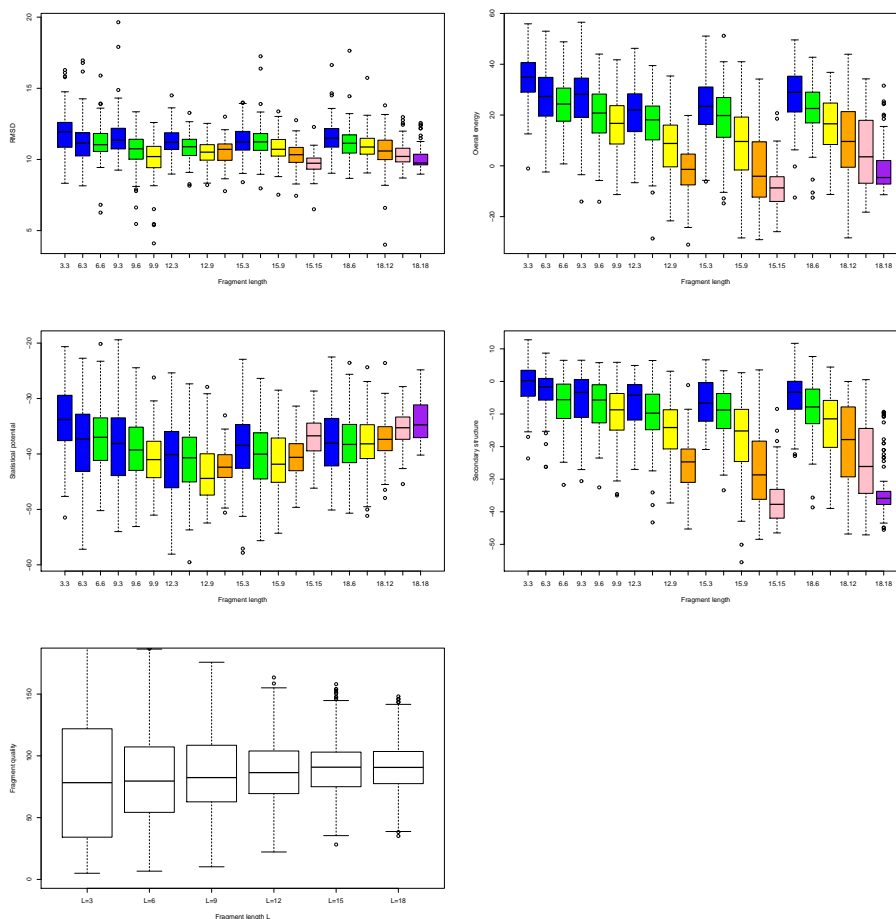

Figure 3: Results for 1c8c, showing the distribution of RMSD to the native, overall energy, statistical potential terms, secondary structure terms and the quality of the fragment set. The distributions are shown in the form of box-and-whisker plots (as implemented in R). The center, top and bottom of the box correspond to the median, top and bottom quartile of the distribution, respectively, with the whiskers indicating the minimum and maximum value reached (outliers are indicated by circles). The notation  $X.Y$  is used to label the results for a fragment length of  $X$  and a move length of  $Y$  and the results appear in lexicographic order.

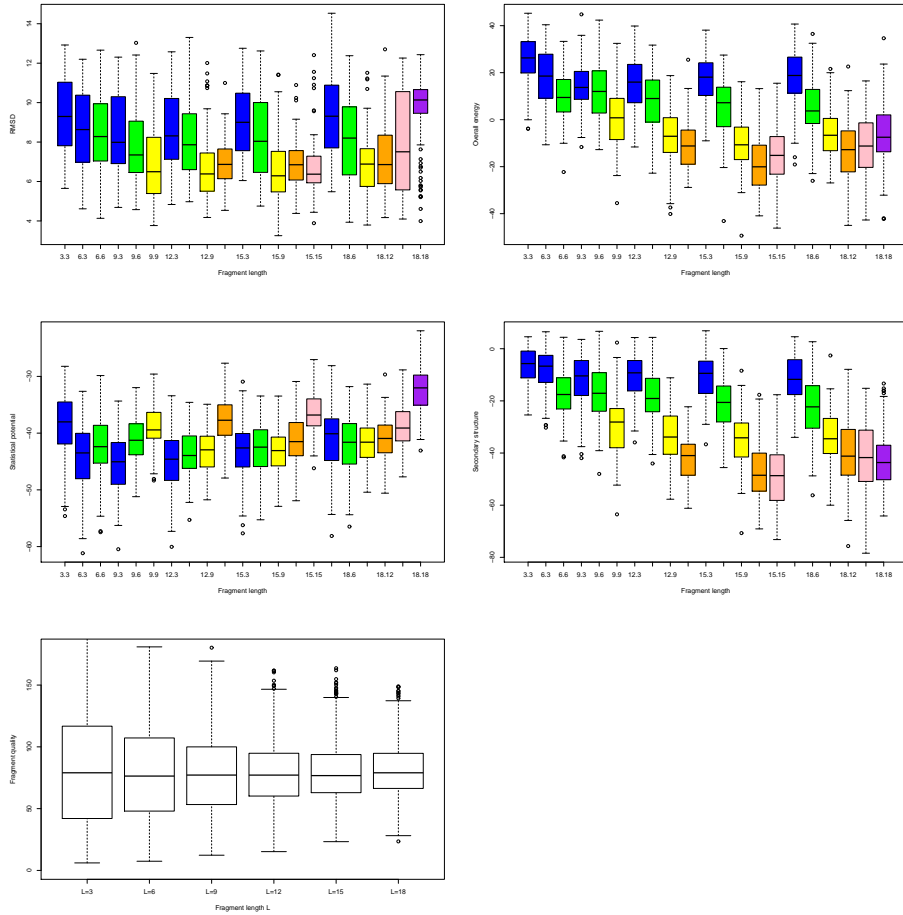

Figure 4: Results for 1c9o, showing the distribution of RMSD to the native, overall energy, statistical potential terms, secondary structure terms and the quality of the fragment set. The distributions are shown in the form of box-and-whisker plots (as implemented in R). The center, top and bottom of the box correspond to the median, top and bottom quartile of the distribution, respectively, with the whiskers indicating the minimum and maximum value reached (outliers are indicated by circles). The notation  $X.Y$  is used to label the results for a fragment length of  $X$  and a move length of  $Y$  and the results appear in lexicographic order.

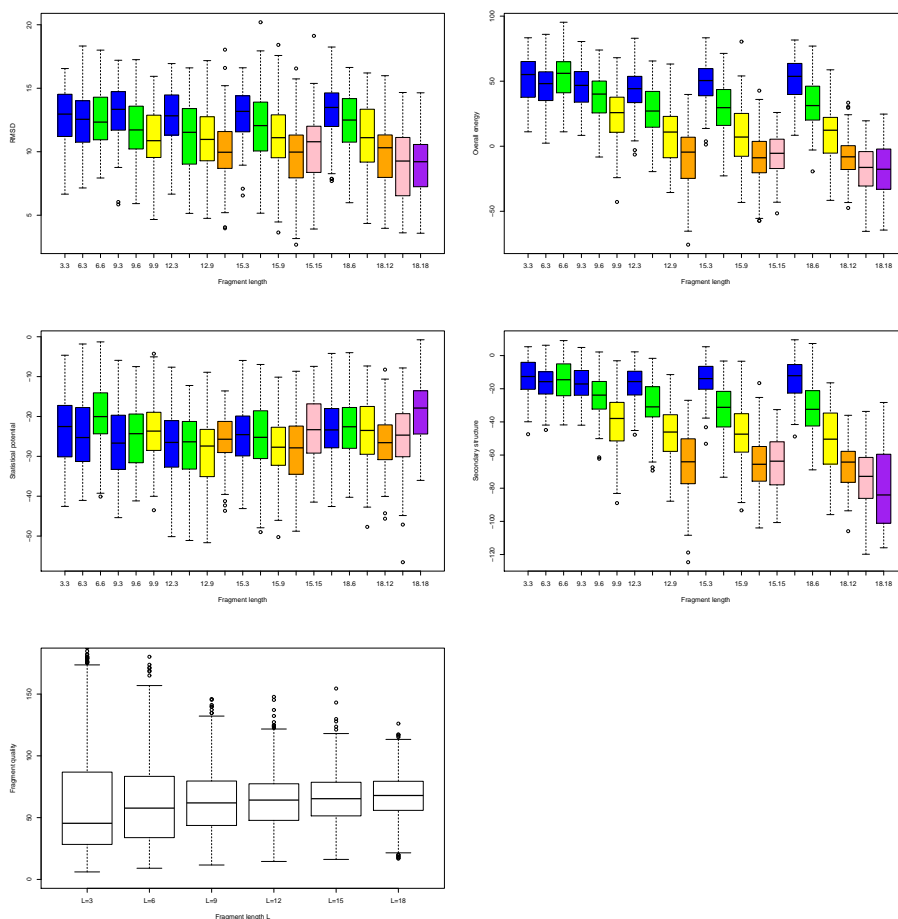

Figure 5: Results for 1fna, showing the distribution of RMSD to the native, overall energy, statistical potential terms, secondary structure terms and the quality of the fragment set. The distributions are shown in the form of box-and-whisker plots (as implemented in R). The center, top and bottom of the box correspond to the median, top and bottom quartile of the distribution, respectively, with the whiskers indicating the minimum and maximum value reached (outliers are indicated by circles). The notation  $X.Y$  is used to label the results for a fragment length of  $X$  and a move length of  $Y$  and the results appear in lexicographic order.

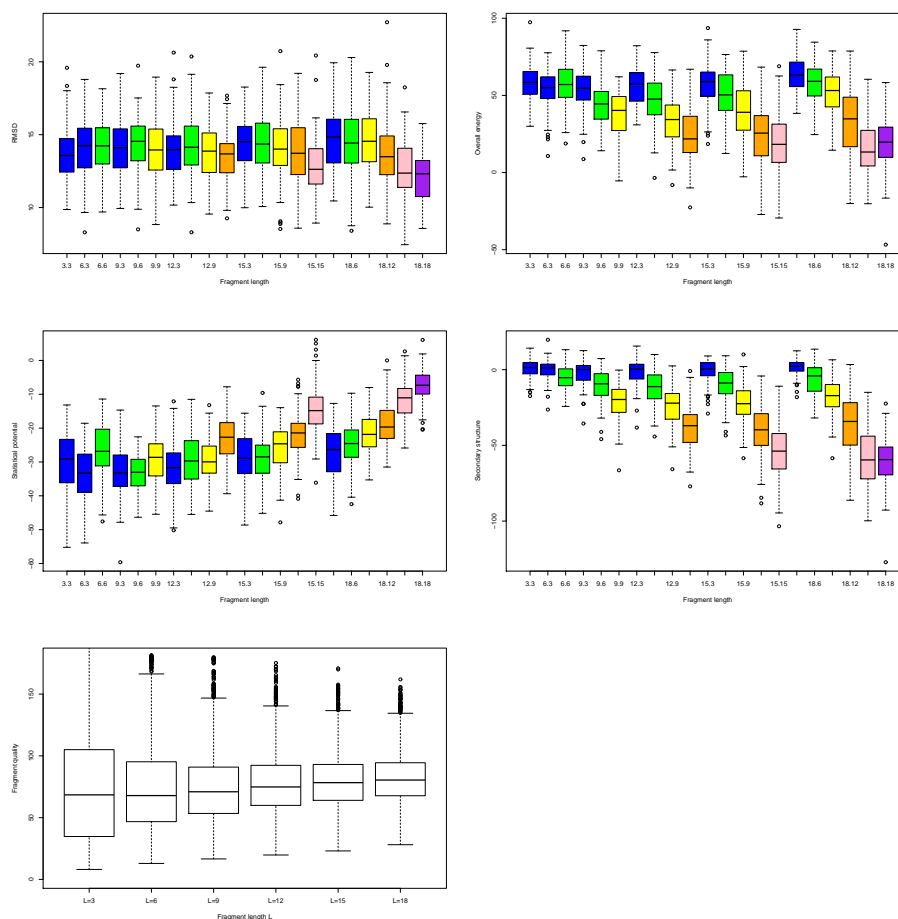

Figure 6: Results for 1gvp, showing the distribution of RMSD to the native, overall energy, statistical potential terms, secondary structure terms and the quality of the fragment set. The distributions are shown in the form of box-and-whisker plots (as implemented in R). The center, top and bottom of the box correspond to the median, top and bottom quartile of the distribution, respectively, with the whiskers indicating the minimum and maximum value reached (outliers are indicated by circles). The notation  $X.Y$  is used to label the results for a fragment length of  $X$  and a move length of  $Y$  and the results appear in lexicographic order.

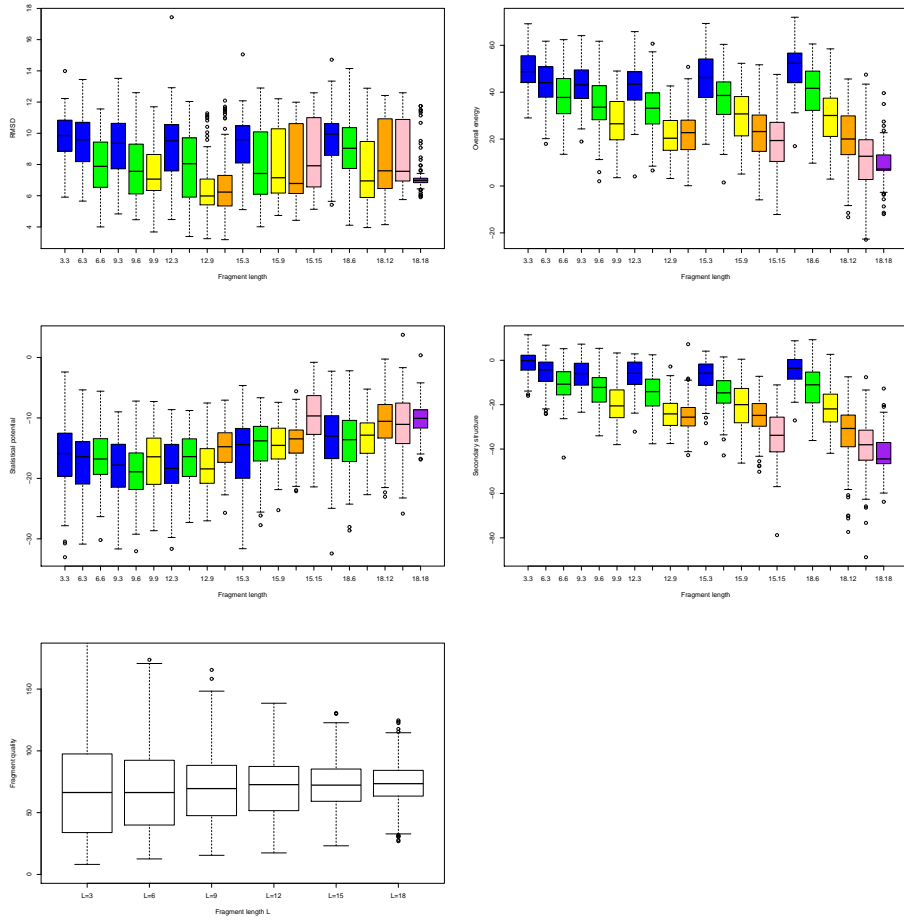

Figure 7: Results for 1shf, showing the distribution of RMSD to the native, overall energy, statistical potential terms, secondary structure terms and the quality of the fragment set. The distributions are shown in the form of box-and-whisker plots (as implemented in R). The center, top and bottom of the box correspond to the median, top and bottom quartile of the distribution, respectively, with the whiskers indicating the minimum and maximum value reached (outliers are indicated by circles). The notation  $X.Y$  is used to label the results for a fragment length of  $X$  and a move length of  $Y$  and the results appear in lexicographic order.



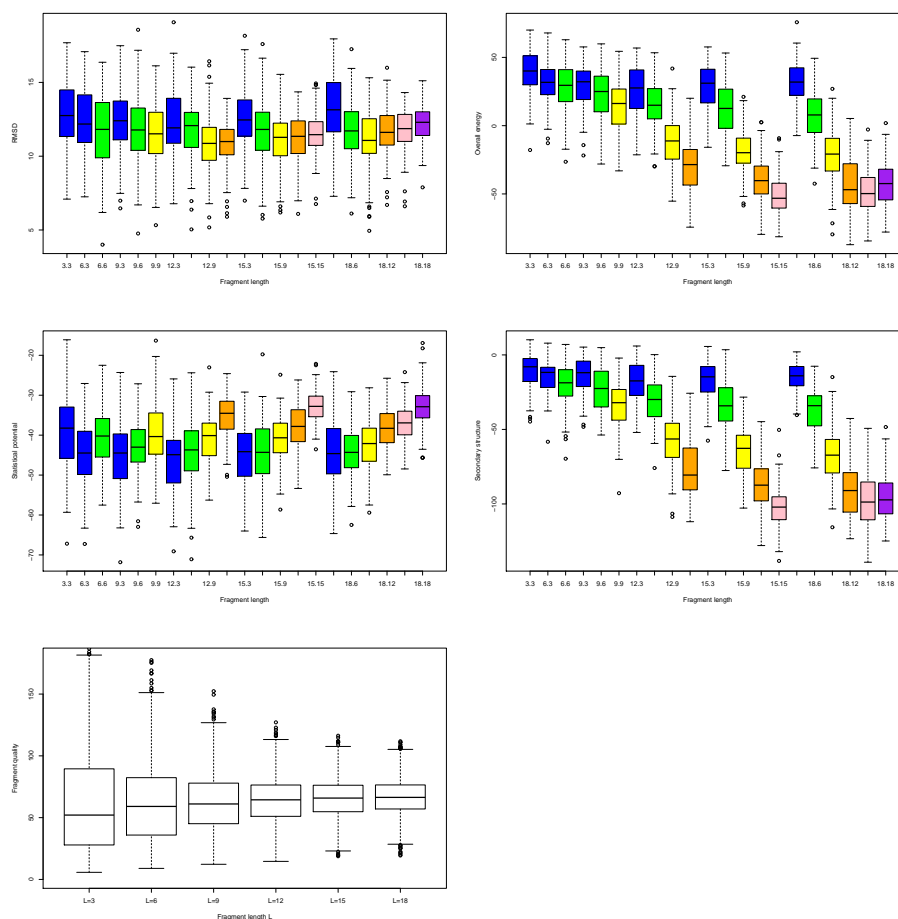

Figure 8: Results for 1ten, showing the distribution of RMSD to the native, overall energy, statistical potential terms, secondary structure terms and the quality of the fragment set. The distributions are shown in the form of box-and-whisker plots (as implemented in R). The center, top and bottom of the box correspond to the median, top and bottom quartile of the distribution, respectively, with the whiskers indicating the minimum and maximum value reached (outliers are indicated by circles). The notation  $X.Y$  is used to label the results for a fragment length of  $X$  and a move length of  $Y$  and the results appear in lexicographic order.

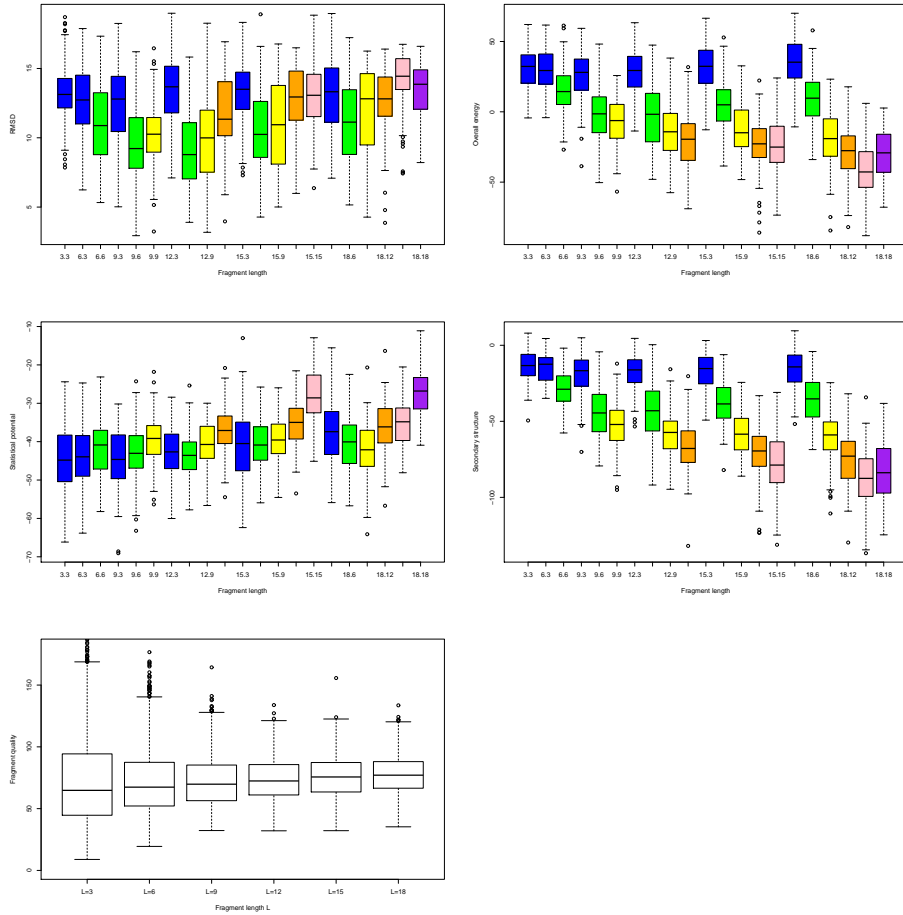

Figure 9: Results for 1tit, showing the distribution of RMSD to the native, overall energy, statistical potential terms, secondary structure terms and the quality of the fragment set. The distributions are shown in the form of box-and-whisker plots (as implemented in R). The center, top and bottom of the box correspond to the median, top and bottom quartile of the distribution, respectively, with the whiskers indicating the minimum and maximum value reached (outliers are indicated by circles). The notation  $X.Y$  is used to label the results for a fragment length of  $X$  and a move length of  $Y$  and the results appear in lexicographic order.

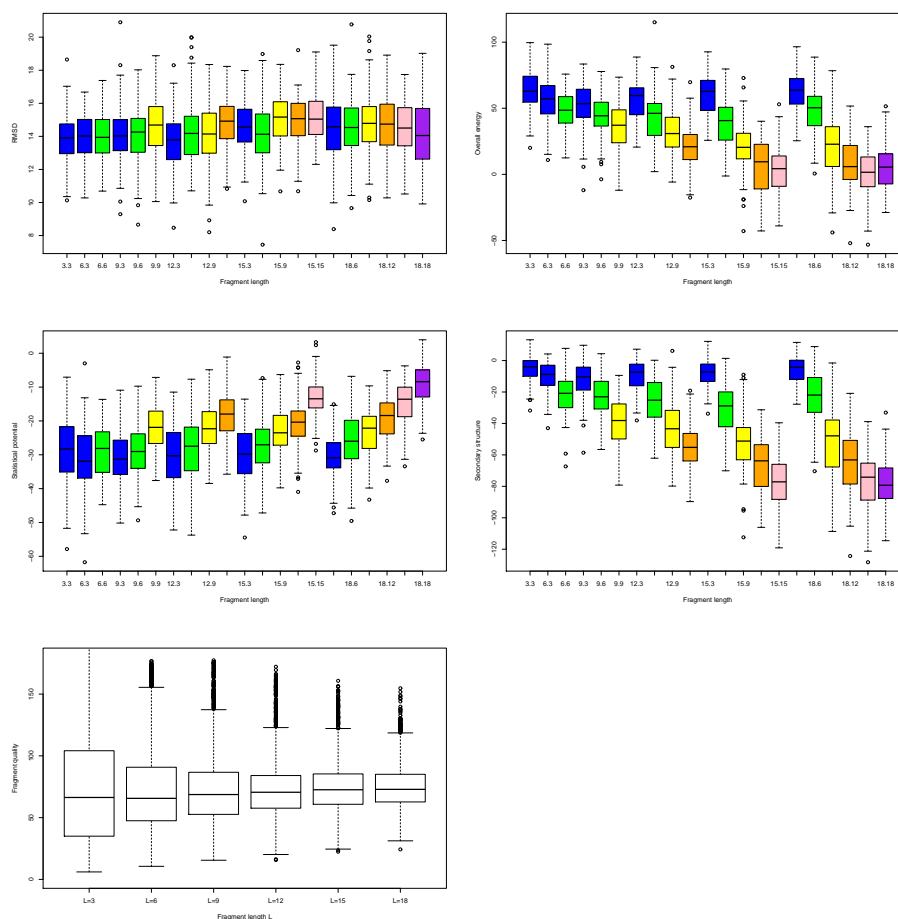

Figure 10: Results for 1tul, showing the distribution of RMSD to the native, overall energy, statistical potential terms, secondary structure terms and the quality of the fragment set. The distributions are shown in the form of box-and-whisker plots (as implemented in R). The center, top and bottom of the box correspond to the median, top and bottom quartile of the distribution, respectively, with the whiskers indicating the minimum and maximum value reached (outliers are indicated by circles). The notation  $X.Y$  is used to label the results for a fragment length of  $X$  and a move length of  $Y$  and the results appear in lexicographic order.

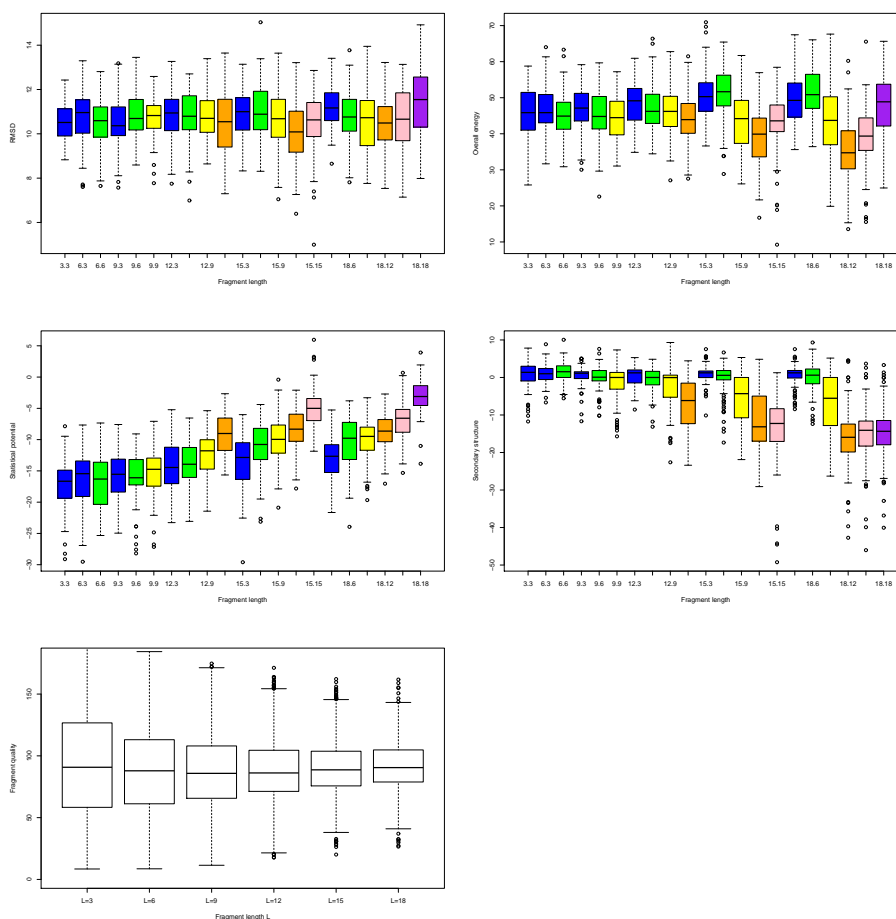

Figure 11: Results for 1vie, showing the distribution of RMSD to the native, overall energy, statistical potential terms, secondary structure terms and the quality of the fragment set. The distributions are shown in the form of box-and-whisker plots (as implemented in R). The center, top and bottom of the box correspond to the median, top and bottom quartile of the distribution, respectively, with the whiskers indicating the minimum and maximum value reached (outliers are indicated by circles). The notation  $X.Y$  is used to label the results for a fragment length of  $X$  and a move length of  $Y$  and the results appear in lexicographic order.

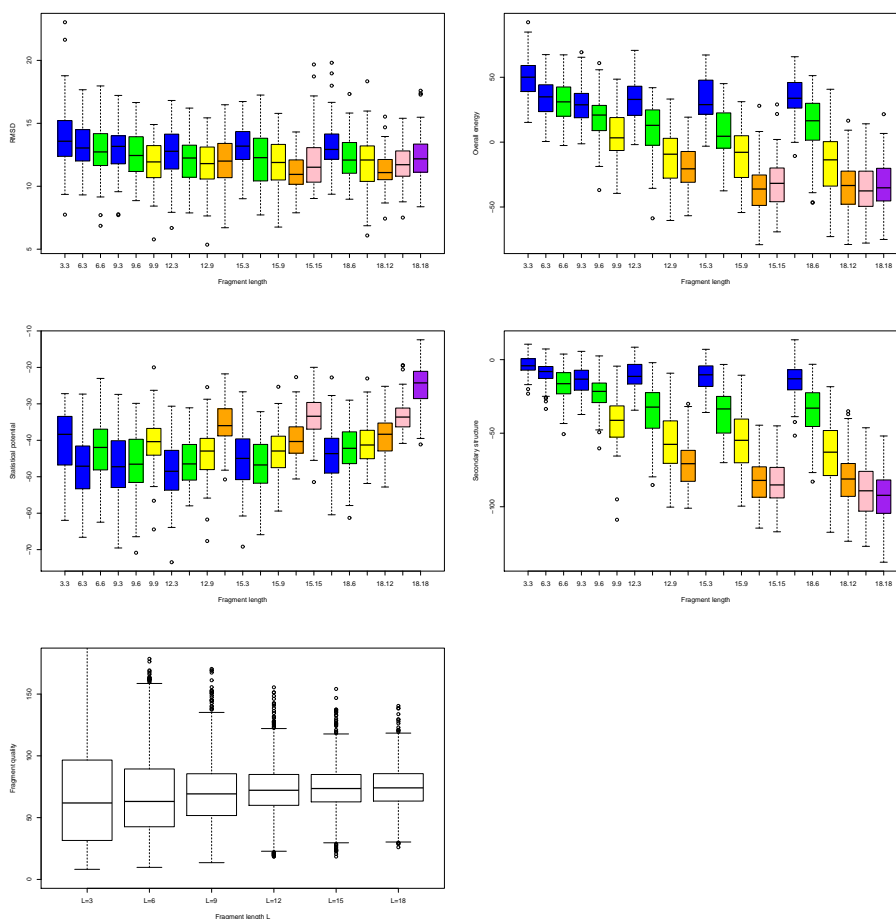

Figure 12: Results for 1who, showing the distribution of RMSD to the native, overall energy, statistical potential terms, secondary structure terms and the quality of the fragment set. The distributions are shown in the form of box-and-whisker plots (as implemented in R). The center, top and bottom of the box correspond to the median, top and bottom quartile of the distribution, respectively, with the whiskers indicating the minimum and maximum value reached (outliers are indicated by circles). The notation  $X.Y$  is used to label the results for a fragment length of  $X$  and a move length of  $Y$  and the results appear in lexicographic order.

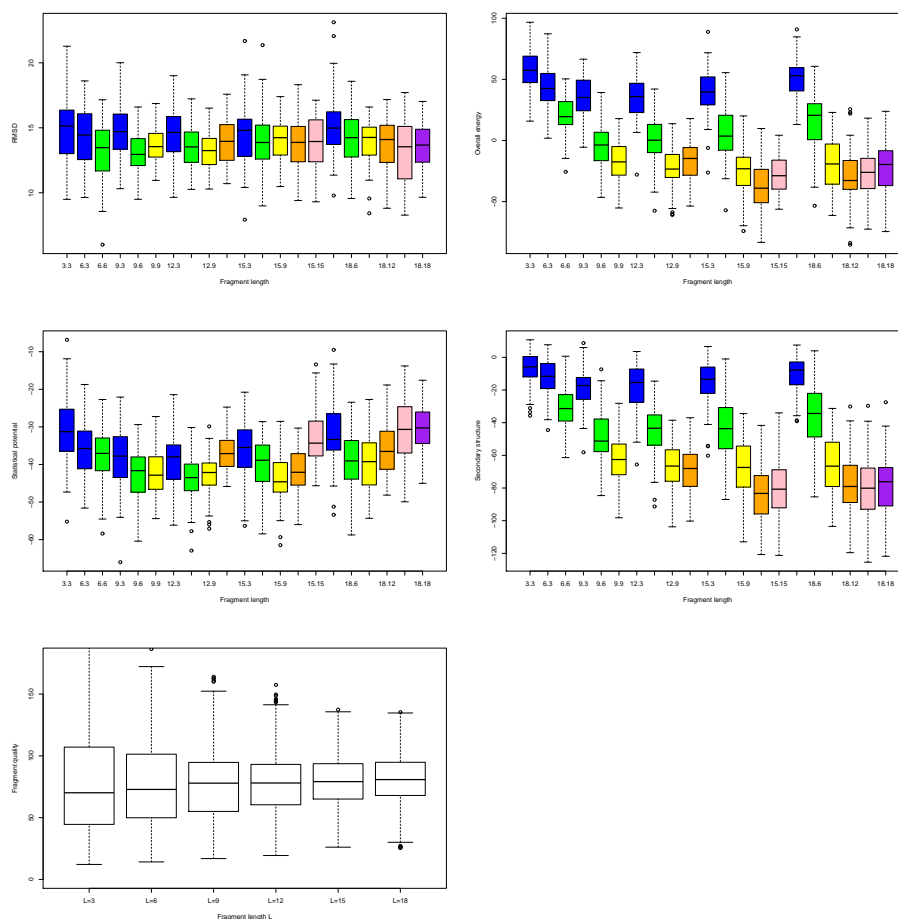

Figure 13: Results for 1wit, showing the distribution of RMSD to the native, overall energy, statistical potential terms, secondary structure terms and the quality of the fragment set. The distributions are shown in the form of box-and-whisker plots (as implemented in R). The center, top and bottom of the box correspond to the median, top and bottom quartile of the distribution, respectively, with the whiskers indicating the minimum and maximum value reached (outliers are indicated by circles). The notation  $X.Y$  is used to label the results for a fragment length of  $X$  and a move length of  $Y$  and the results appear in lexicographic order.
